# Supplementary material for: Transition-metal-free, visible-light induced cyclization of arylsulfonyl chlorides with o-azidoarylalkynes: a regiospecific route to unsymmetrical 2,3-disubstituted indoles
Source: Royal Society of Chemistry journal article supplement (doi:10.1039/c6cc10305g), 2017-01-01
Supplement: c6cc10305g1.pdf [file c6cc10305g1.pdf]

# **Transition-metal-free, Visible-light Induced Cyclization of Arylsulfonyl Chlorides with *o*-Azidoarylalkynes: A Regiospecific Route to Unsymmetrical 2,3-Disubstituted Indoles**

Lijun Gu, <sup>\*a</sup>Cheng Jin,<sup>b</sup> Wei Wang,<sup>a</sup> Yonghui He,<sup>a</sup> Guangyu Yang<sup>c</sup> and Ganpeng Li<sup>a</sup>

<sup>a</sup>Key Laboratory of Chemistry in Ethnic Medicinal Resources, State Ethnic Affairs Commission & Ministry of Education, Yunnan Minzu University, Kunming, Yunnan, 650500, China

<sup>b</sup>New United Group Company Limited, Changzhou, Jiangsu, 213166, China

<sup>c</sup>Key Laboratory of Tobacco Chemistry of Yunnan Province, Yunnan Academy of Tobacco Science, Kunming, Yunnan, 650106, China

Email: gulijun2005@126.com

## **Supporting Information**

### **List of Contents**

- (A) Materials and equipment
- (B) Typical experimental procedure
- (C) Analytical data
- (D) References
- (E) Spectra

## (A) Materials and equipment

Reagents were obtained commercially and used as received. Solvents were purified and dried by standard methods. *o*-Azidoarylalkynes **2** were prepared according the literature methods.<sup>1</sup> All title products were characterized by <sup>1</sup>H NMR, <sup>13</sup>C NMR, MS and High Resolution mass spectrometer (HRMS). <sup>1</sup>H NMR spectra were recorded on 400 MHz in CDCl<sub>3</sub>, and <sup>13</sup>C NMR spectra were recorded on 100 MHz in CDCl<sub>3</sub> using tetramethylsilane (TMS) as an internal standard. Chemical shift values ( $\delta$ ) are given in ppm. Coupling constants (*J*) were measured in Hz. Mass spectra were obtained with ionization voltages of 70 eV. HRMS spectra were obtained by ESI on a TOF mass. 200-300 mesh silica gel was used for column chromatography.

## (B) Typical experimental procedure

### Typical Experimental Procedure for the Synthesis of compounds **3**:

To a Schlenk tube were added arylsulfonyl chlorides **1** (0.35 mmol), *o*-azidoarylalkynes **2** (0.3 mmol), Eosin Y (3 mol%), MeCN (2.0 mL), 1,4-CHD (0.45 mmol), Na<sub>2</sub>HPO<sub>4</sub> (0.3 mmol). Then the tube was charged with argon, and was stirred at room temperature with the irradiation of a 5 W blue LED ( $\lambda_{\text{max}} = 455 \text{ nm}$ ) for about 12 h. After the reaction was finished, the reaction mixture was diluted in 35 mL ethyl acetate, washed with a saturated solution of brine (8 mL), saturated NaHCO<sub>3</sub> (10 mL), a saturated solution of brine (8 mL), dried (Na<sub>2</sub>SO<sub>4</sub>) and concentrated in vacuum, and the resulting residue was purified by silica gel column chromatography (hexane/ethyl acetate) to afford the desired products **3**.

## (C) Analytical data

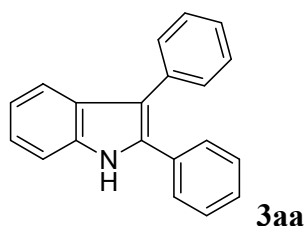

### 2,3-Diphenyl-1H-indole (**3aa**):

<sup>1</sup>H NMR (400 MHz, CDCl<sub>3</sub>)  $\delta$ : 8.23 (brs, 1H), 7.71 (d, *J* = 8.0 Hz, 1H), 7.54-7.27 (m, 12H), 7.16 (d, *J* = 8.4 Hz, 1H); <sup>13</sup>C NMR (100 MHz, CDCl<sub>3</sub>)  $\delta$ : 136.0 135.1, 134.2, 132.8, 132.6, 130.2, 128.8, 128.7, 128.5, 128.2, 127.7, 126.4, 122.8, 120.5, 119.7, 110.6; LRMS (EI 70 ev) *m/z* (%): 269 (M<sup>+</sup>, 100); HRMS *m/z* (ESI) calcd for C<sub>20</sub>H<sub>16</sub>N (M+H)<sup>+</sup> 270.1283, found 270.1279.

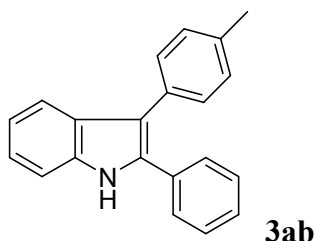

**2-Phenyl-3-*p*-tolyl-1H-indole (3ab):**

$^1\text{H}$  NMR (400 MHz,  $\text{CDCl}_3$ )  $\delta$ : 8.20 (brs, 1H), 7.74 (d,  $J = 80$  Hz, 1H), 7.50-7.20 (m, 12H), 2.44 (s, 3H);  $^{13}\text{C}$  NMR (100 MHz,  $\text{CDCl}_3$ )  $\delta$ : 136.0, 135.9, 134.1, 132.8, 132.1, 130.0, 129.3, 129.0, 128.7, 128.2, 127.7, 122.7, 120.5, 119.8, 115.1, 111.1, 21.5; LRMS (EI 70 ev)  $m/z$  (%): 283 ( $\text{M}^+$ , 100); HRMS  $m/z$  (ESI) calcd for  $\text{C}_{21}\text{H}_{18}\text{N}$  ( $\text{M}+\text{H}$ ) $^+$  284.1435, found 284.1441.

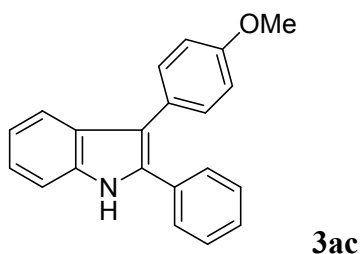

**3-(4-Methoxyphenyl)-2-phenyl-1H-indole (3ac):**

$^1\text{H}$  NMR (400 MHz,  $\text{CDCl}_3$ )  $\delta$ : 8.20 (brs, 1H), 7.55-7.51 (m, 3H), 7.48-7.46 (m, 1H), 7.35-7.30 (m, 4H), 7.27-7.25 (m, 1H), 7.16 (t,  $J = 6.8$  Hz, 1H), 7.06 (t,  $J = 6.8$  Hz, 1H), 6.98 (t,  $J = 7.6$  Hz, 2H), 3.84 (s, 3H);  $^{13}\text{C}$  NMR (100 MHz,  $\text{CDCl}_3$ )  $\delta$ : 158.2, 136.4, 133.8, 133.2, 130.9, 128.8, 128.4, 128.3, 128.1, 127.6, 127.1, 122.1, 119.6, 118.7, 114.1, 111.3, 54.5; LRMS (EI 70 ev)  $m/z$  (%): 299 ( $\text{M}^+$ , 100); HRMS  $m/z$  (ESI) calcd for  $\text{C}_{21}\text{H}_{18}\text{NO}$  ( $\text{M}+\text{H}$ ) $^+$  300.1383, found 300.1390.

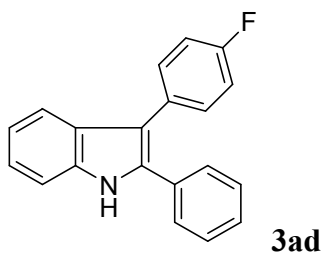

**3-(4-Fluorophenyl)-2-phenyl-1H-indole (3ad):**

$^1\text{H}$  NMR (400 MHz,  $\text{CDCl}_3$ )  $\delta$ : 8.18 (s, 1H), 7.63 (d,  $J = 8.0$  Hz, 1H), 7.40-7.34 (m, 5H), 7.31-7.28 (m, 3H), 7.23-7.20 (m, 1H), 7.16-7.13 (m, 1H), 7.09-7.04 (m, 2H);  $^{13}\text{C}$  NMR (100 MHz,  $\text{CDCl}_3$ )  $\delta$ : 162.7 (d,  $J = 241.3$  Hz), 136.0, 134.3, 132.7, 131.88 (d,  $J = 6.0$  Hz), 131.1, 131.0, 129.05 (d,  $J = 34.5$  Hz), 128.4, 128.0, 122.9, 120.7, 119.5, 115.4 (d,  $J = 26.5$  Hz), 114.2, 111.1; LRMS (EI 70 ev)  $m/z$  (%): 287 ( $\text{M}^+$ , 100); HRMS  $m/z$  (ESI) calcd for  $\text{C}_{20}\text{H}_{15}\text{FN}$  ( $\text{M}+\text{H}$ ) $^+$  288.1189, found 288.1193.

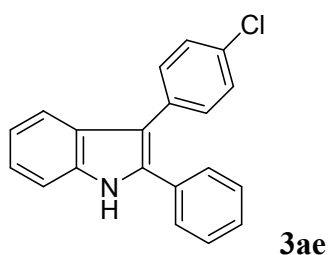

**3-(4-Chlorophenyl)-2-phenyl-1H-indole (3ae):**

$^1\text{H}$  NMR (400 MHz,  $\text{CDCl}_3$ )  $\delta$ : 8.19 (brs, 1H), 7.65 (d,  $J = 8.0$  Hz, 1H), 7.46-7.30 (m, 10H), 7.25 (t,  $J = 6.2$  Hz, 1H), 7.18 (t,  $J = 8.0$  Hz, 1H);  $^{13}\text{C}$  NMR (100 MHz,  $\text{CDCl}_3$ )  $\delta$ : 136.1, 134.5, 133.7, 132.4, 132.0, 131.4, 129.1, 128.8, 128.5, 128.3, 128.1, 123.0, 120.8, 119.5, 113.9, 111.0; LRMS (EI 70 eV)  $m/z$  (%): 303 ( $\text{M}^+$ , 72); HRMS  $m/z$  (ESI) calcd for  $\text{C}_{20}\text{H}_{15}\text{ClN}$  ( $\text{M}+\text{H}$ ) $^+$  304.0894, found 304.0898.

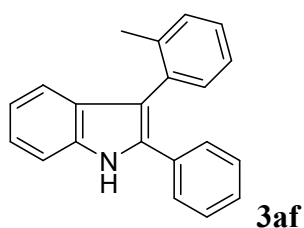

**2-Phenyl-3-o-tolyl-1H-indole (3af):**

$^1\text{H}$  NMR (400 MHz,  $\text{CDCl}_3$ )  $\delta$ : 8.25 (brs, 1H), 7.47 (d,  $J = 8.0$  Hz, 1H), 7.37-7.29 (m, 7H), 7.25-7.19 (m, 4H), 7.12 (dd,  $J = 10.8$  Hz,  $J = 1.6$  Hz, 1H), 2.08 (s, 3H);  $^{13}\text{C}$  NMR (100 MHz,  $\text{CDCl}_3$ )  $\delta$ : 137.8, 136.1, 134.6, 133.8, 133.1, 131.7, 130.3, 129.8, 128.8, 127.7, 127.2, 126.8, 125.9, 122.8, 120.3, 120.2, 114.9, 110.8, 20.4; LRMS (EI 70 eV)  $m/z$  (%): 283 ( $\text{M}^+$ , 100); HRMS  $m/z$  (ESI) calcd for  $\text{C}_{21}\text{H}_{18}\text{N}$  ( $\text{M}+\text{H}$ ) $^+$  284.1435, found 284.1444.

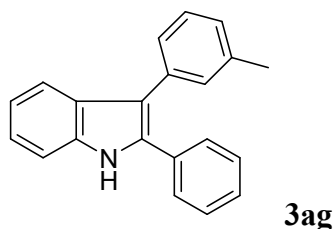

**2-Phenyl-3-m-tolyl-1H-indole (3ag):**

$^1\text{H}$  NMR (400 MHz,  $\text{CDCl}_3$ )  $\delta$ : 8.24 (brs, 1H), 7.78 (d,  $J = 8.0$  Hz, 1H), 7.50-7.46 (m, 3H), 7.41-7.35 (m, 4H), 7.34-7.19 (m, 5H), 2.43 (s, 3H);  $^{13}\text{C}$  NMR (100 MHz,  $\text{CDCl}_3$ )  $\delta$ : 138.8, 136.4, 136.1,

135.5, 134.1, 133.0, 129.3, 129.0, 128.8, 128.3, 127.4, 126.0, 125.3, 124.3, 122.1, 120.1, 118.7, 111.4, 25.1; LRMS (EI 70 ev)  $m/z$  (%): 283 ( $M^+$ , 100); HRMS  $m/z$  (ESI) calcd for  $C_{21}H_{18}NO$  ( $M+H$ )<sup>+</sup> 284.1435, found 284.1439.

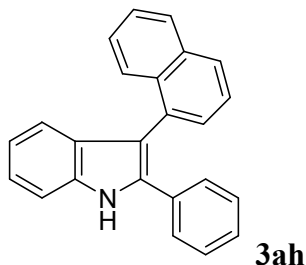

### 3-(Naphthalen-1-yl)-2-phenyl-1H-indole (3ah):

<sup>1</sup>H NMR (400 MHz,  $CDCl_3$ )  $\delta$ : 8.21 (brs, 1H), 7.99 (d,  $J = 7.2$  Hz, 1H), 7.84 (d,  $J = 8.0$  Hz, 1H), 7.58-7.45 (m, 5H), 7.40-7.36 (m, 2H), 7.33-7.24 (m, 3H), 7.18 (t,  $J = 7.4$  Hz, 3H), 7.09-7.05 (m, 1H); <sup>13</sup>C NMR (100 MHz,  $CDCl_3$ )  $\delta$ : 137.5, 136.4, 134.6, 134.2, 133.4, 132.2, 130.2, 129.9, 129.5, 129.1, 129.0, 128.3, 127.1, 126.9, 126.7, 126.4, 126.0, 123.1, 120.8, 116.7, 112.3, 111.9; LRMS (EI 70 ev)  $m/z$  (%): 319 ( $M^+$ , 100); HRMS  $m/z$  (ESI) calcd for  $C_{24}H_{18}N$  ( $M+Na$ )<sup>+</sup> 320.1434, found 320.1429.

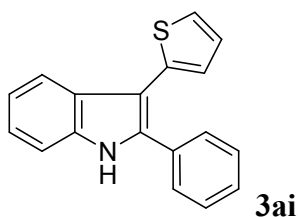

### 2-Phenyl-3-(thiophen-2-yl)-1H-indole (3ai):

<sup>1</sup>H NMR (400 MHz,  $CDCl_3$ )  $\delta$ : 8.23 (brs, 1H), 7.80 (d,  $J = 5.6$  Hz, 1H), 7.54-7.49 (m, 2H), 7.41 (d,  $J = 7.2$  Hz, 1H), 7.38-7.31 (m, 3H), 7.30 (dd,  $J = 0.8$  Hz,  $J = 4.8$  Hz, 1H), 7.27-7.23 (m, 1H), 7.20-7.17 (m, 1H), 7.08 (dd,  $J = 2.8$  Hz,  $J = 3.6$  Hz, 1H), 7.05 (dd,  $J = 1.2$  Hz,  $J = 0.8$ , 1H); <sup>13</sup>C NMR (100 MHz,  $CDCl_3$ )  $\delta$ : 136.3, 135.6, 135.2, 132.3, 128.8, 128.6, 128.3, 128.0, 127.3, 126.3, 124.6, 122.9, 120.7, 119.8, 110.8, 108.1; LRMS (EI 70 ev)  $m/z$  (%): 275 ( $M^+$ , 100); HRMS  $m/z$  (ESI) calcd for  $C_{18}H_{14}NS$  ( $M+H$ )<sup>+</sup> 276.0841, found 276.0837.

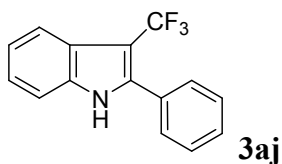

### 3-(Trifluoromethyl)-2-phenyl-1H-indole (3aj):

<sup>1</sup>H NMR (400 MHz,  $CDCl_3$ )  $\delta$ : 8.30 (brs, 1H), 7.84 (d,  $J = 8.0$  Hz, 1H), 7.60-7.57 (m, 2H), 7.51-7.47 (m, 3H), 7.41-7.39 (m, 1H), 7.30-7.23 (m, 2H); <sup>13</sup>C NMR (100 MHz,  $CDCl_3$ )  $\delta$ : 138.7 (q,  $J = 4.7$

Hz), 135.0, 131.1, 129.9, 129.5, 129.2, 129.1, 128.8, 127.8, 127.3, 125.8 (d,  $J = 1.7$  Hz), 123.6, 121.9, 120.2 (d,  $J = 2.2$  Hz), 111.1, 104.1 (q,  $J = 35.8$  Hz); LRMS (EI 70 ev)  $m/z$  (%): 261 ( $M^+$ , 100); HRMS  $m/z$  (ESI) calcd for  $C_{15}H_{11}F_3N$  ( $M+H$ ) $^+$  262.0839, found 262.0845.

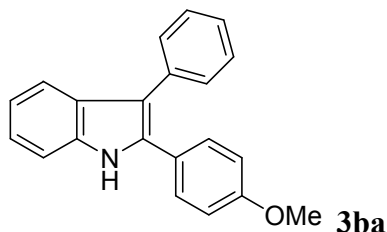

### 2-(4-Methoxyphenyl)-3-phenyl-1H-indole (3ba):

$^1H$  NMR (400 MHz,  $CDCl_3$ )  $\delta$ : 8.20 (brs, 1H), 7.75 (d,  $J = 7.2$  Hz, 1H), 7.58 (d,  $J = 8.0$  Hz, 1H), 7.54-7.36 (m, 7H), 7.29 (t,  $J = 7.2$  Hz, 1H), 7.18 (d,  $J = 5.4$  Hz, 1H), 6.85 (d,  $J = 8.0$  Hz, 2H), 3.82 (s, 3H);  $^{13}C$  NMR (100 MHz,  $CDCl_3$ )  $\delta$ : 160.3, 137.2, 136.7, 135.1, 130.8, 130.2, 129.5, 129.2, 126.7, 126.0, 122.7, 120.6, 119.5, 114.7, 112.0, 111.8, 55.4; LRMS (EI 70 ev)  $m/z$  (%): 299 ( $M^+$ , 100); HRMS  $m/z$  (ESI) calcd for  $C_{21}H_{18}NO$  ( $M+H$ ) $^+$  300.1383, found 300.1389.

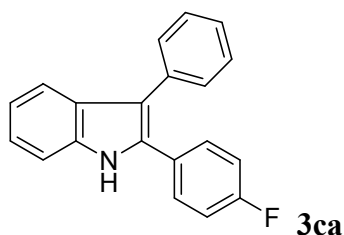

### 2-(4-Fluorophenyl)-3-phenyl-1H-indole (3ca):

$^1H$  NMR (400 MHz,  $CDCl_3$ )  $\delta$ : 8.17 (brs, 1H), 7.67 (d,  $J = 7.6$  Hz, 1H), 7.47-7.37 (m, 5H), 7.32-7.29 (m, 1H), 7.27-7.21 (m, 2H), 7.16 (dd,  $J = 10.4$  Hz,  $J = 2.0$  Hz, 2H), 7.10-7.06 (m, 1H), 6.99-6.93 (m, 1H);  $^{13}C$  NMR (100 MHz,  $CDCl_3$ )  $\delta$ : 164.1 (d,  $J = 244.4$  Hz), 136.0, 134.8 (d,  $J = 13.6$  Hz), 134.6, 132.7, 130.4, 130.3, 128.9, 128.8, 126.7, 123.9 (d,  $J = 3.4$  Hz), 123.2, 120.7, 120.0, 116.0, 115.1 (d,  $J = 24.6$  Hz), 114.7, 114.5, 111.0; LRMS (EI 70 ev)  $m/z$  (%): 287 ( $M^+$ , 100); HRMS  $m/z$  (ESI) calcd for  $C_{20}H_{15}FN$  ( $M+H$ ) $^+$  288.1189, found 288.1197.

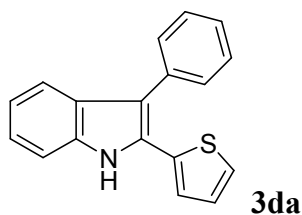

### 3-Phenyl-2-(thiophen-2-yl)-1H-indole (3da):

$^1H$  NMR (400 MHz,  $CDCl_3$ )  $\delta$ : 8.26 (brs, 1H), 7.56-7.52 (m, 3H), 7.49 (dd,  $J = 10.0$  Hz,  $J = 2.4$

Hz, 2H), 7.42-7.37 (m, 3H), 7.23 (dd,  $J = 1.2$  Hz,  $J = 8.4$  Hz, 1H), 7.14-7.10 (m, 1H), 6.38 (dd,  $J = 3.2$  Hz,  $J = 2.8$  Hz, 1H), 6.35 (d,  $J = 3.6$  Hz, 2H);  $^{13}\text{C}$  NMR (100 MHz,  $\text{CDCl}_3$ )  $\delta$ : 147.2, 141.5, 135.4, 134.7, 130.3, 128.9, 128.5, 127.1, 125.4, 123.0, 120.4, 119.5, 114.7, 112.0, 110.8, 106.9; HRMS  $m/z$  (ESI) calcd for  $\text{C}_{18}\text{H}_{14}\text{NS}$  ( $\text{M}+\text{H}$ ) $^+$  276.0841, found 276.0844.

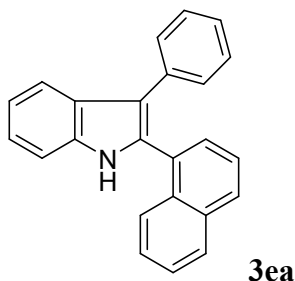

**2-(Naphthalen-1-yl)-3-phenyl-1H-indole (3ea):**

$^1\text{H}$  NMR (400 MHz,  $\text{CDCl}_3$ )  $\delta$ : 8.15 (brs, 1H), 7.91-7.82 (m, 4H), 7.46-7.37 (m, 4H), 7.34-7.31 (m, 3H), 7.28 (t,  $J = 6.8$  Hz, 1H), 7.22-7.14 (m, 3H), 7.11 (t,  $J = 7.4$  Hz, 1H);  $^{13}\text{C}$  NMR (100 MHz,  $\text{CDCl}_3$ )  $\delta$ : 136.0, 135.0, 133.7, 133.2, 132.3, 130.7, 129.3, 128.8, 128.5, 128.2, 127.7, 126.7, 126.2, 126.1, 125.8, 125.4, 122.7, 120.5, 119.8, 116.8, 111.1; LRMS (EI 70 ev)  $m/z$  (%): 319 ( $\text{M}^+$ , 100); HRMS  $m/z$  (ESI) calcd for  $\text{C}_{24}\text{H}_{18}\text{N}$  ( $\text{M}+\text{H}$ ) $^+$  320.1434, found 320.1439.

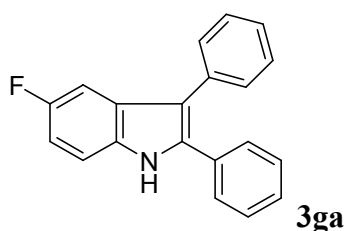

**5-Fluoro-2,3-diphenyl-1H-indole (3ga):**

$^1\text{H}$  NMR (400 MHz,  $\text{CDCl}_3$ )  $\delta$ : 8.21 (brs, 1H), 7.54-7.41 (m, 6H), 7.40-7.28 (m, 6H), 7.03-6.99 (m, 1H);  $^{13}\text{C}$  NMR (100 MHz,  $\text{CDCl}_3$ )  $\delta$ : 159.4 (d,  $J = 234.1$  Hz), 135.7, 134.4, 132.4, 130.0, 129.2 (d,  $J = 8.4$  Hz), 128.8 (d,  $J = 9.8$  Hz), 128.0, 127.8, 126.5, 115.2, 111.6 (d,  $J = 10.7$  Hz), 111.2, 110.9, 104.7 (d,  $J = 23.8$  Hz); LRMS (EI 70 ev)  $m/z$  (%): 287 ( $\text{M}^+$ , 100); HRMS  $m/z$  (ESI) calcd for  $\text{C}_{20}\text{H}_{15}\text{FN}$  ( $\text{M}+\text{H}$ ) $^+$  288.1189, found 288.1196.

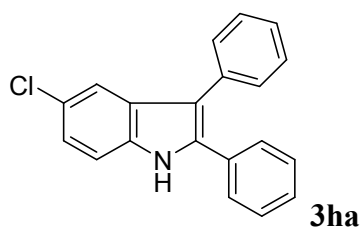

**5-Chloro-2,3-diphenyl-1H-indole (3ha):**

$^1\text{H}$  NMR (400 MHz,  $\text{CDCl}_3$ )  $\delta$ : 8.24 (brs, 1H), 7.67 (d,  $J = 2.8$  Hz, 1H), 7.51-7.43 (m, 5H), 7.41-7.29 (m, 6H), 7.22 (dd,  $J = 6.8$  Hz,  $J = 2.4$  Hz, 1H);  $^{13}\text{C}$  NMR (100 MHz,  $\text{CDCl}_3$ )  $\delta$ : 135.3, 134.2, 134.1, 132.0, 130.1, 129.8, 128.7, 128.6, 128.1, 128.0, 126.6, 126.2, 122.9, 119.1, 114.8, 111.7; LRMS (EI 70 ev)  $m/z$  (%): 303 ( $\text{M}^+$ , 66); HRMS  $m/z$  (ESI) calcd for  $\text{C}_{20}\text{H}_{15}\text{ClN}$  ( $\text{M}+\text{H}$ ) $^+$  304.0894, found 304.0890.

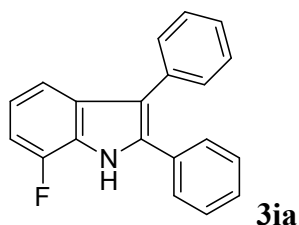

**7-Fluoro-2,3-diphenyl-1H-indole (3ia):**

$^1\text{H}$  NMR (400 MHz,  $\text{CDCl}_3$ )  $\delta$ : 8.39 (brs, 1H), 7.55-7.29 (m, 11H), 7.10-7.04 (m, 1H), 7.03 (ddd,  $J = 6.0$  Hz,  $J = 2.4$  Hz,  $J = 4.4$  Hz, 1H);  $^{13}\text{C}$  NMR (100 MHz,  $\text{CDCl}_3$ )  $\delta$ : 151.1 (d,  $J = 353.8$  Hz), 135.1, 134.7, 132.5 (d,  $J = 2.5$  Hz), 132.3, 130.1, 128.9, 128.3 (d,  $J = 28.9$  Hz), 126.5, 124.4, 124.1, 120.7, 115.7 (d,  $J = 10.8$  Hz), 115.3, 107.5 (d,  $J = 14.3$  Hz); LRMS (EI 70 ev)  $m/z$  (%): 287 ( $\text{M}^+$ , 100); HRMS  $m/z$  (ESI) calcd for  $\text{C}_{20}\text{H}_{15}\text{FN}$  ( $\text{M}+\text{H}$ ) $^+$  288.1189, found 288.1191.

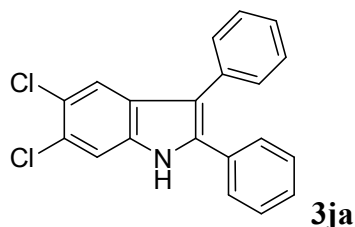

**5,6-Dichloro-2,3-diphenyl-1H-indole (3ja):**

$^1\text{H}$  NMR (400 MHz,  $\text{CDCl}_3$ )  $\delta$ : 8.22 (brs, 1H), 7.69 (s, 1H), 7.53 (s, 1H), 7.45-7.29 (m, 10H);  $^{13}\text{C}$  NMR (100 MHz,  $\text{CDCl}_3$ )  $\delta$ : 135.8, 134.5, 133.7, 131.6, 129.8, 128.8, 128.7, 128.5, 128.1, 128.0, 126.6, 126.1, 124.5, 120.5, 114.6, 112.2; LRMS (EI 70 ev)  $m/z$  (%): 337 ( $\text{M}^+$ , 67); HRMS  $m/z$  (ESI) calcd for  $\text{C}_{20}\text{H}_{14}\text{Cl}_2\text{N}$  ( $\text{M}+\text{H}$ ) $^+$  338.0504 found 338.0510

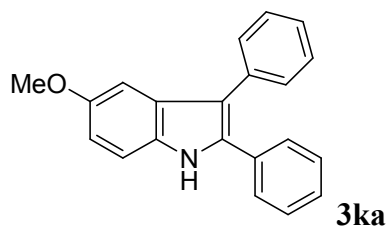

**5-Methoxy-2,3-diphenyl-1H-indole (3ka):**

$^1\text{H}$  NMR (400 MHz,  $\text{CDCl}_3$ )  $\delta$ : 8.14 (brs, 1H), 7.47-7.34 (m, 6H), 7.32-7.28 (m, 5H), 7.15 (d,  $J$



= 2.4 Hz, 1H), 6.94 (dd,  $J = 10.0$  Hz,  $J = 2.4$  Hz, 1H), 3.83 (s, 3H);  $^{13}\text{C}$  NMR (100 MHz,  $\text{CDCl}_3$ )  $\delta$ : 154.7, 135.3, 134.8, 132.6, 131.1, 130.0, 129.2, 128.6, 128.5, 128.1, 127.6, 126.2, 114.8, 112.9, 111.7, 101.2, 55.8; LRMS (EI 70 eV)  $m/z$  (%): 299 ( $\text{M}^+$ , 100); HRMS  $m/z$  (ESI) calcd for  $\text{C}_{21}\text{H}_{18}\text{NO}$  ( $\text{M}+\text{H}$ ) $^+$  300.1383, found 300.1380.

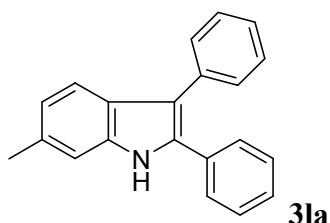

### 6-Methyl-2,3-diphenyl-1H-indole (3la):

$^1\text{H}$  NMR (400 MHz,  $\text{CDCl}_3$ )  $\delta$ : 8.09 (brs, 1H), 7.61 (d,  $J = 8.0$  Hz, 1H), 7.51-7.29 (m, 10H), 7.23 (s, 1H), 7.05 (dd,  $J = 8.4$  Hz,  $J = 0.8$  Hz, 1H), 2.51 (s, 3H);  $^{13}\text{C}$  NMR (100 MHz,  $\text{CDCl}_3$ )  $\delta$ : 136.3, 135.2, 133.4, 132.7, 132.5, 130.0, 128.7, 128.3, 127.9, 127.4, 126.5, 126.0, 122.1, 119.5, 114.9, 110.6, 21.4; LRMS (EI 70 eV)  $m/z$  (%): 283 ( $\text{M}^+$ , 100); HRMS  $m/z$  (ESI) calcd for  $\text{C}_{21}\text{H}_{18}\text{N}$  ( $\text{M}+\text{H}$ ) $^+$  284.1435, found 284.1437.

### References

1. Lu, B.; Luo, Y.; Liu, L.; Ye, L.; Wang, Y.; Zhang, L. *Angew. Chem. Int. Ed.* **2011**, *50*, 8358.

(E) Spectra

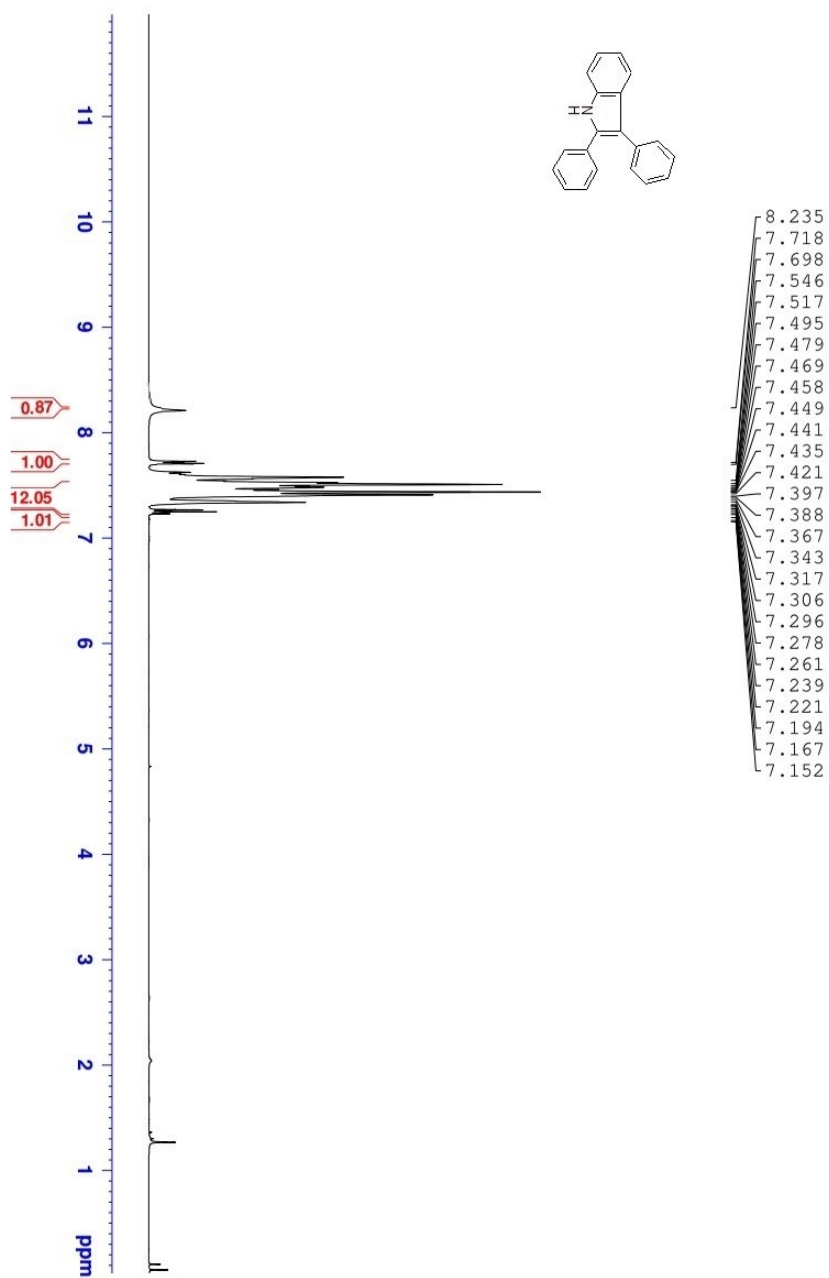

<sup>1</sup>H NMR of Compound 3aa

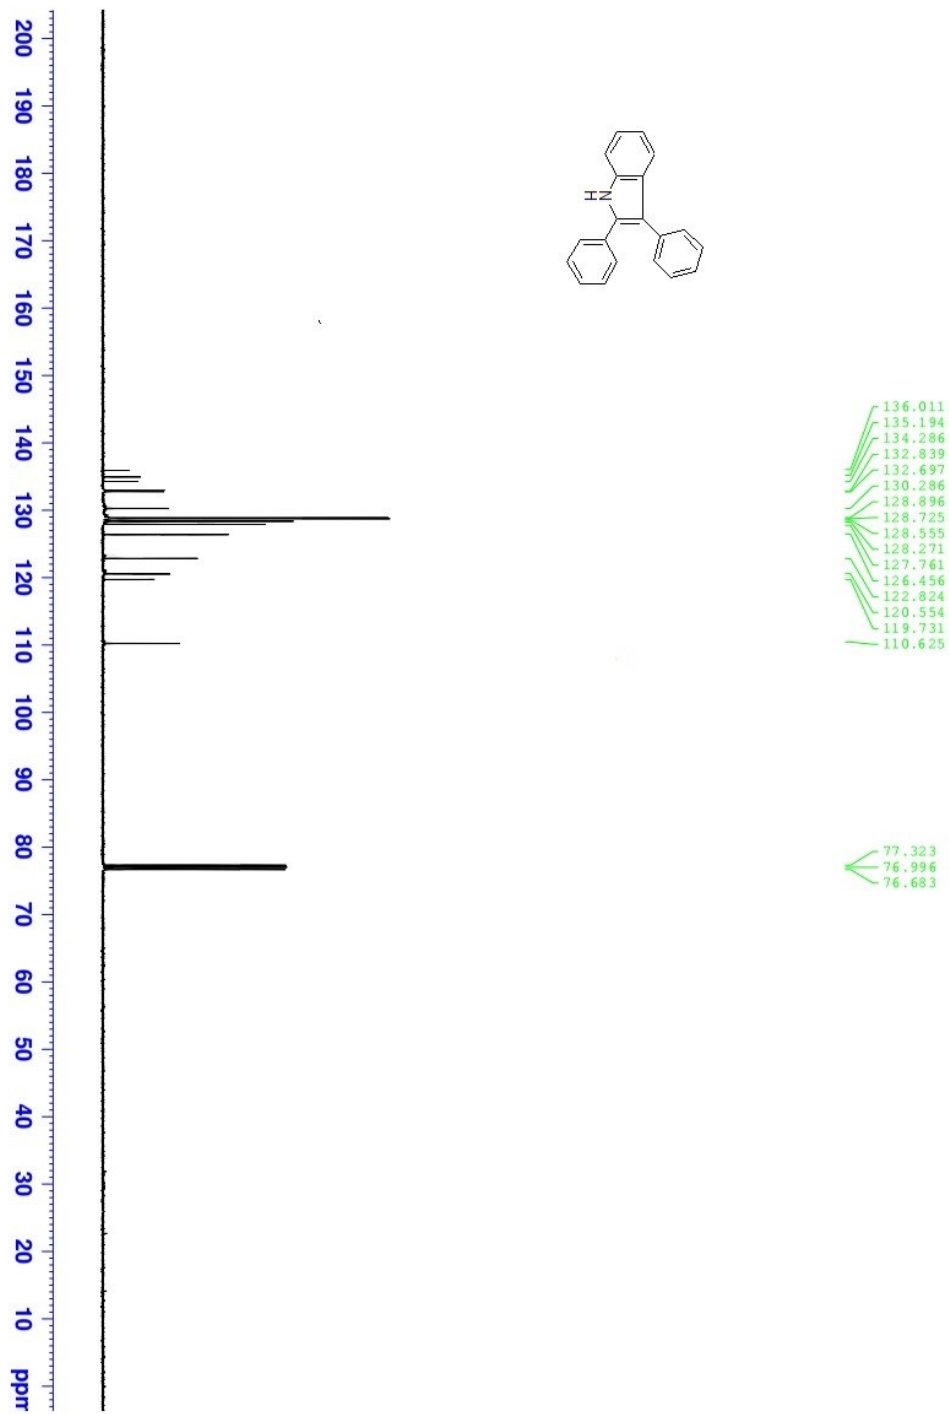

<sup>13</sup>C NMR of Compound 3aa

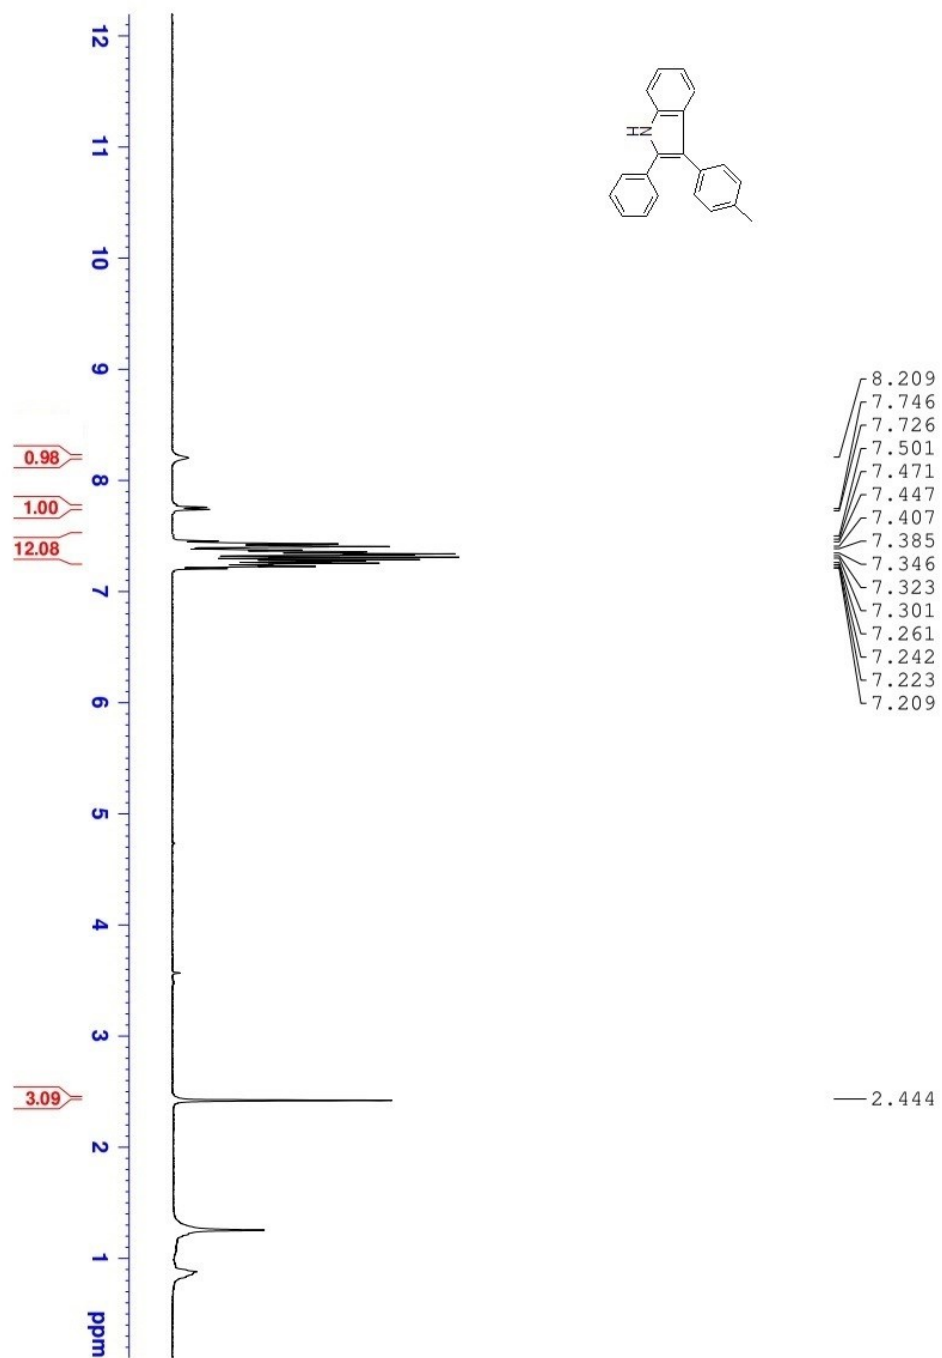

<sup>1</sup>H NMR of Compound 3ab

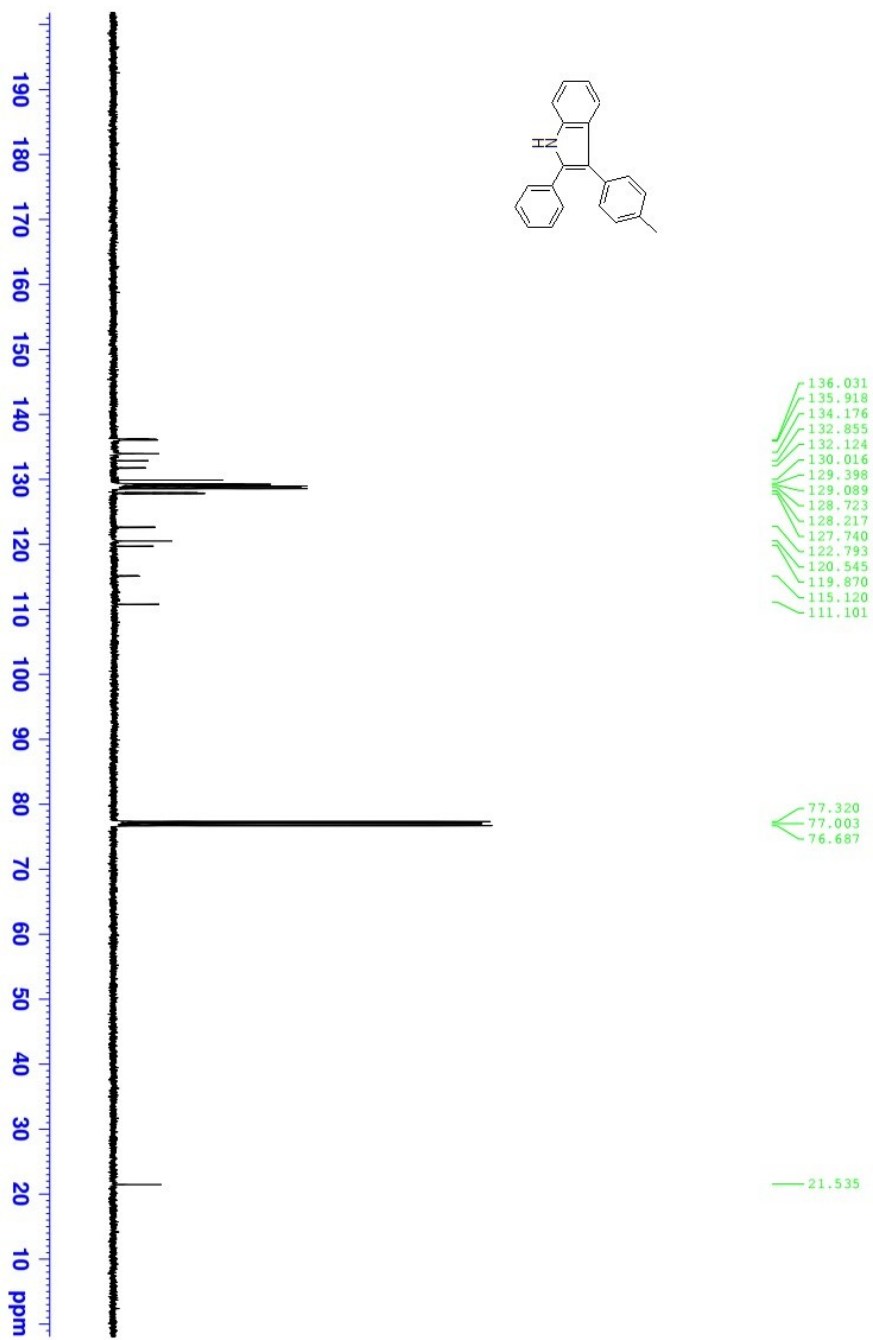

**<sup>13</sup>C NMR of Compound 3ab**

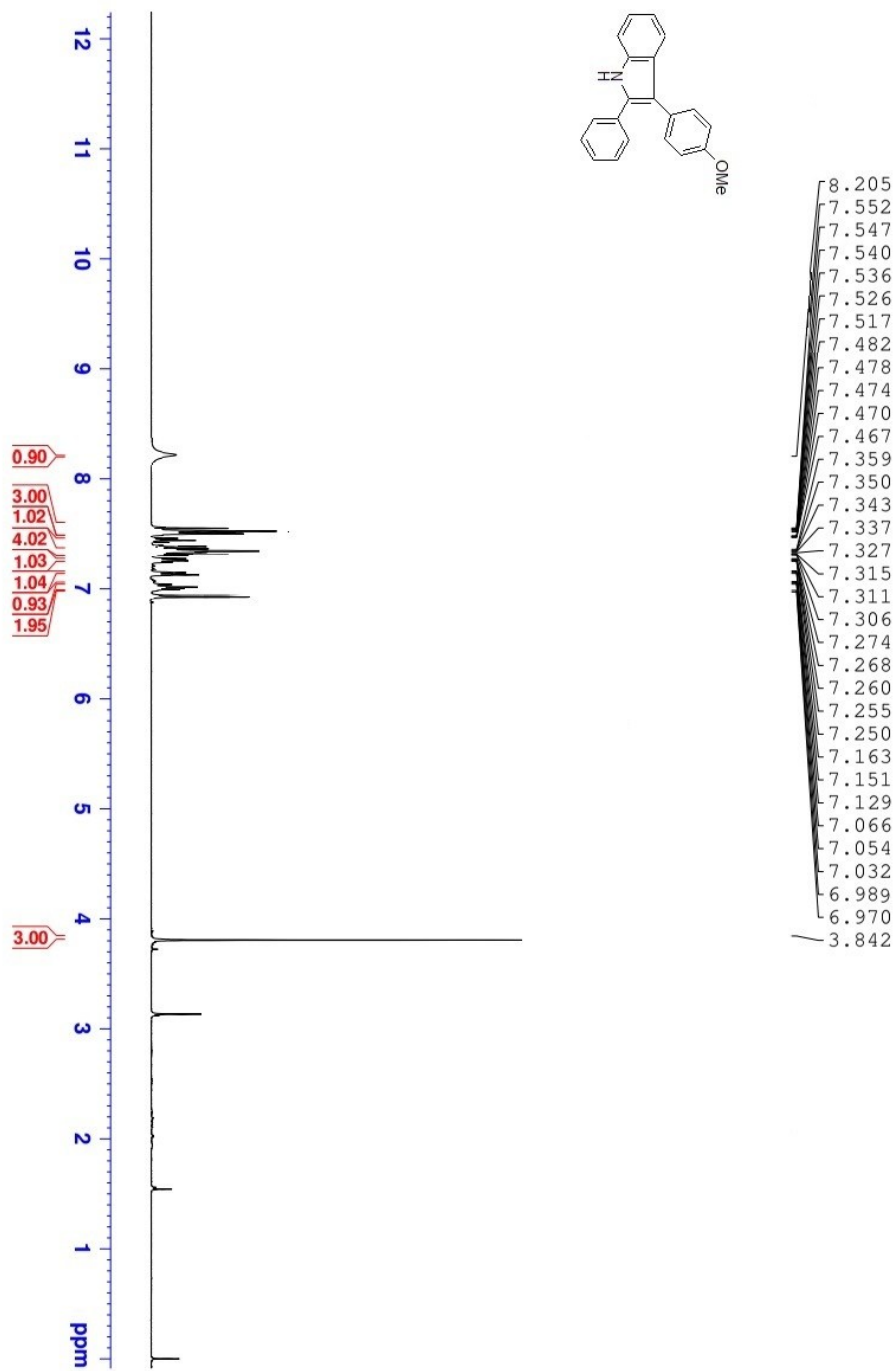

<sup>1</sup>H NMR of Compound 3ac

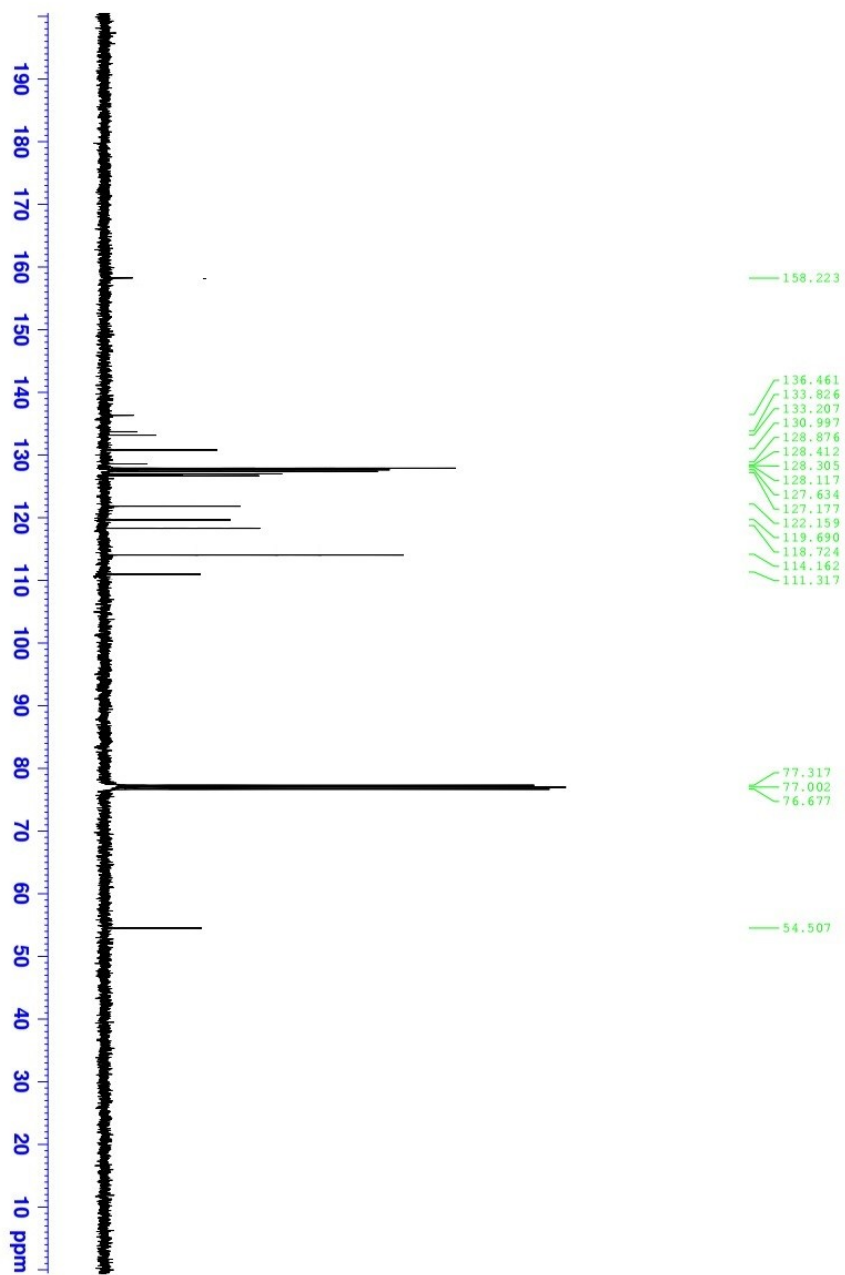

<sup>13</sup>C NMR of Compound 3ac

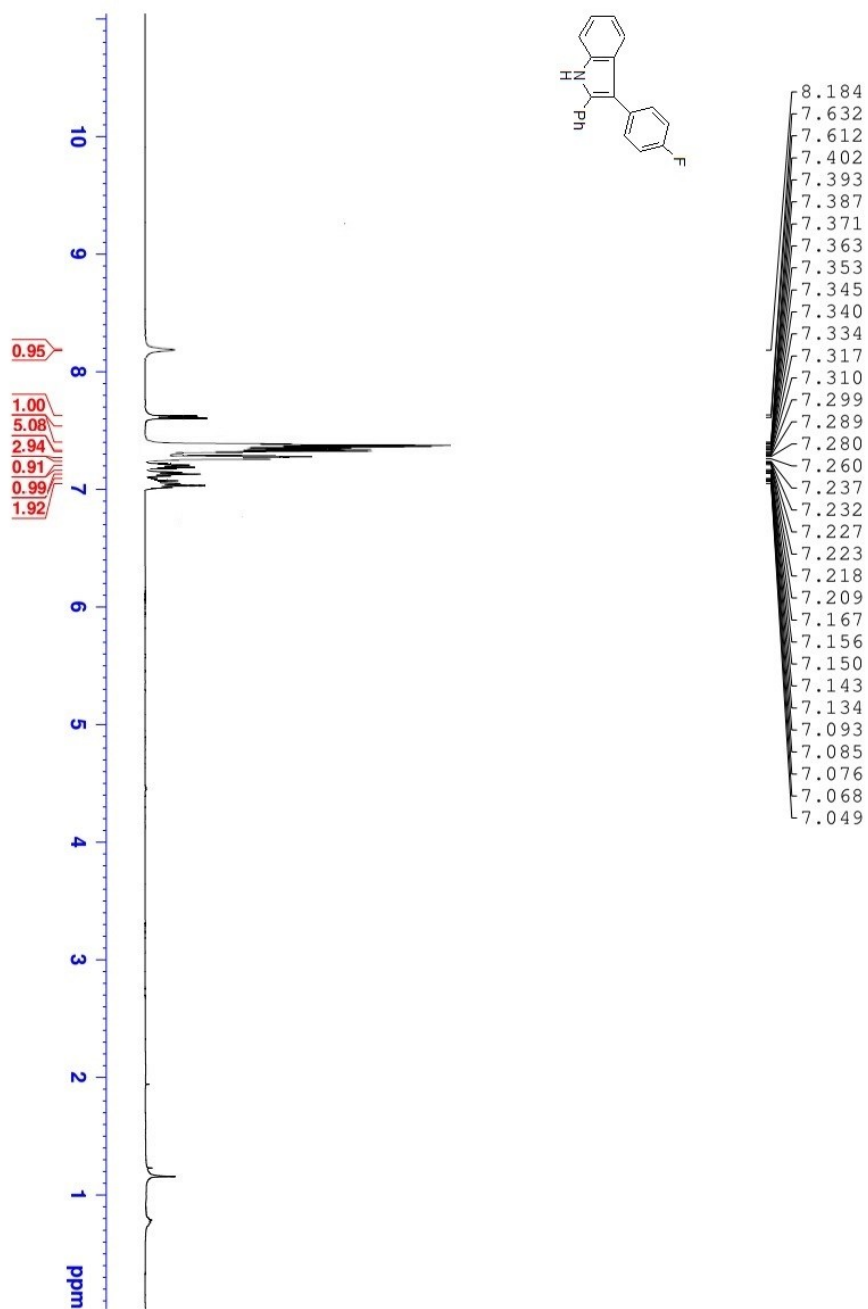

**<sup>1</sup>H NMR of Compound 3ad**



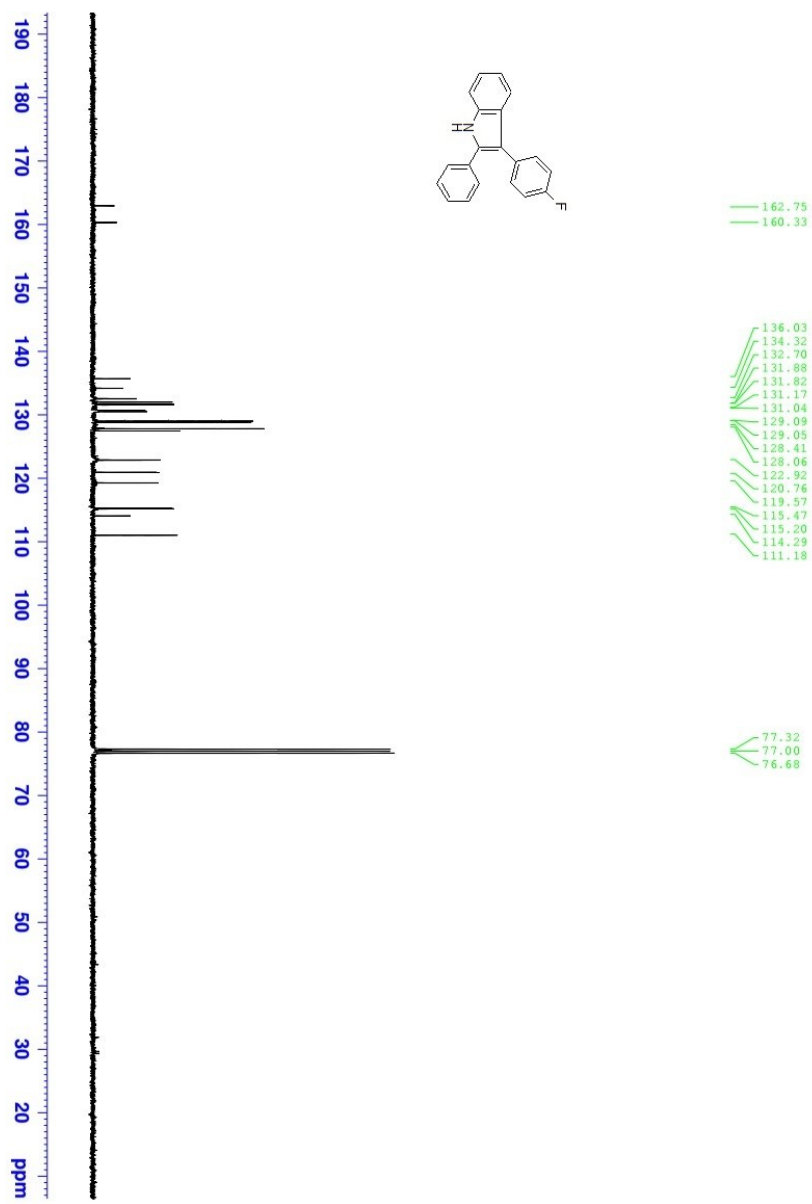

<sup>13</sup>C NMR of Compound 3ad

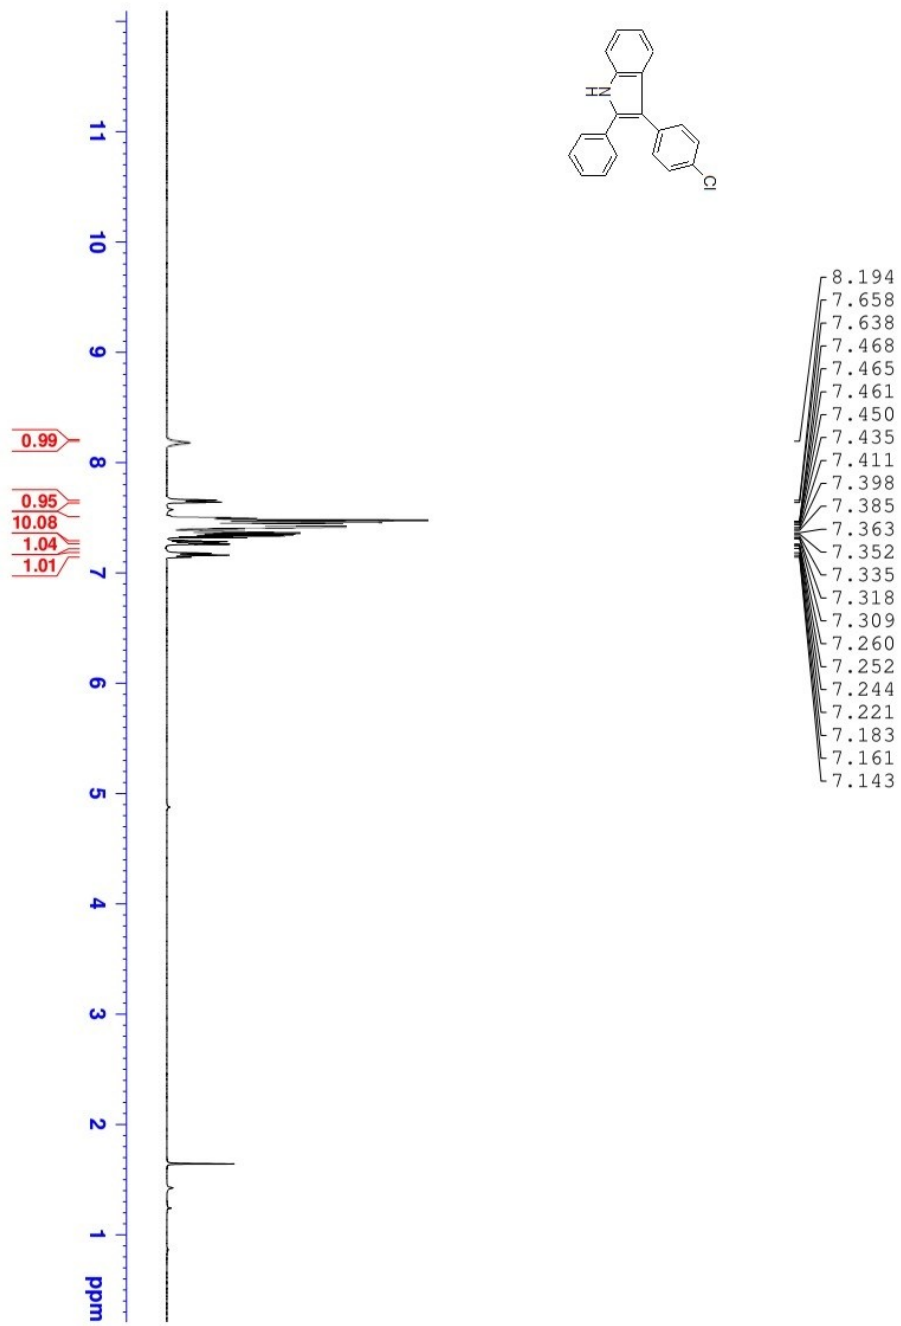

<sup>1</sup>H NMR of Compound 3ae

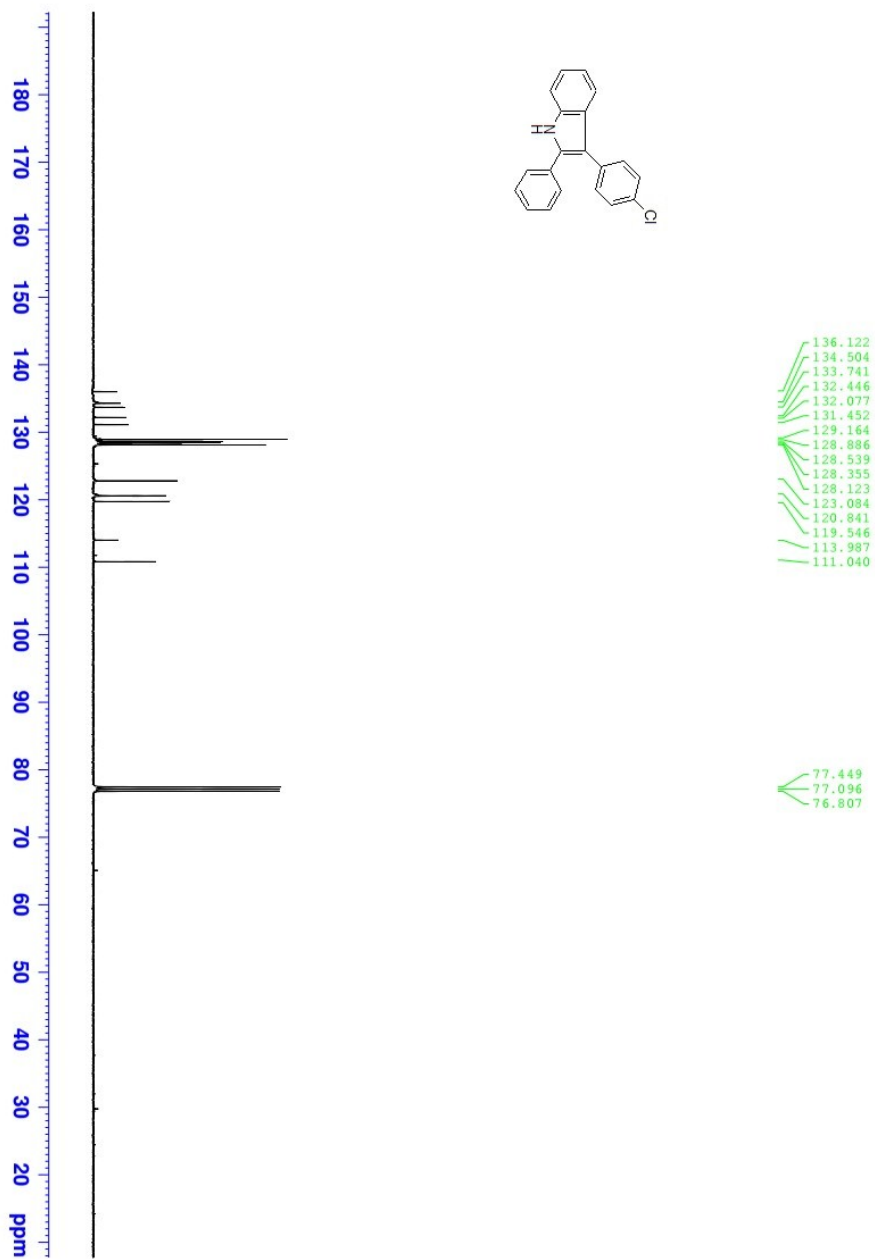

<sup>13</sup>C NMR of Compound 3ae

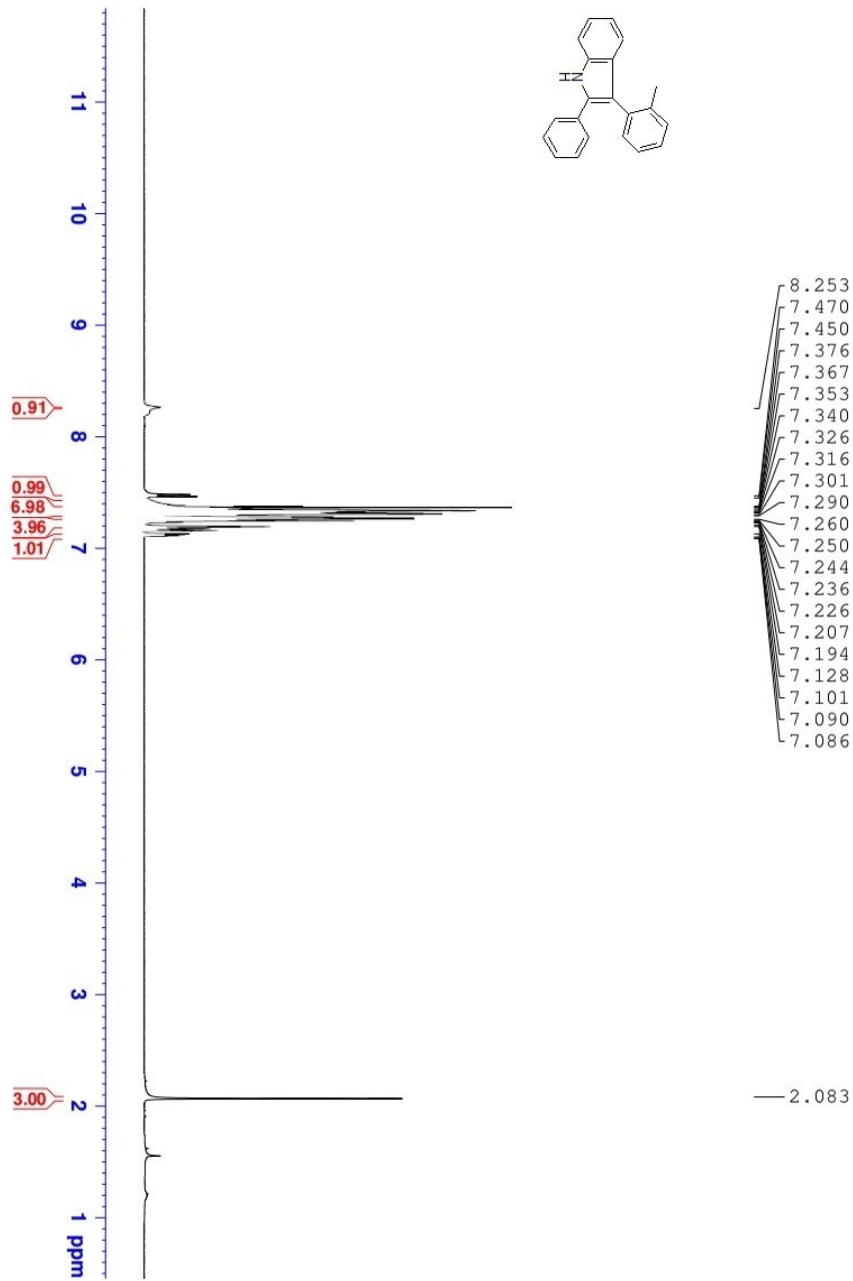

<sup>1</sup>H NMR of Compound 3af

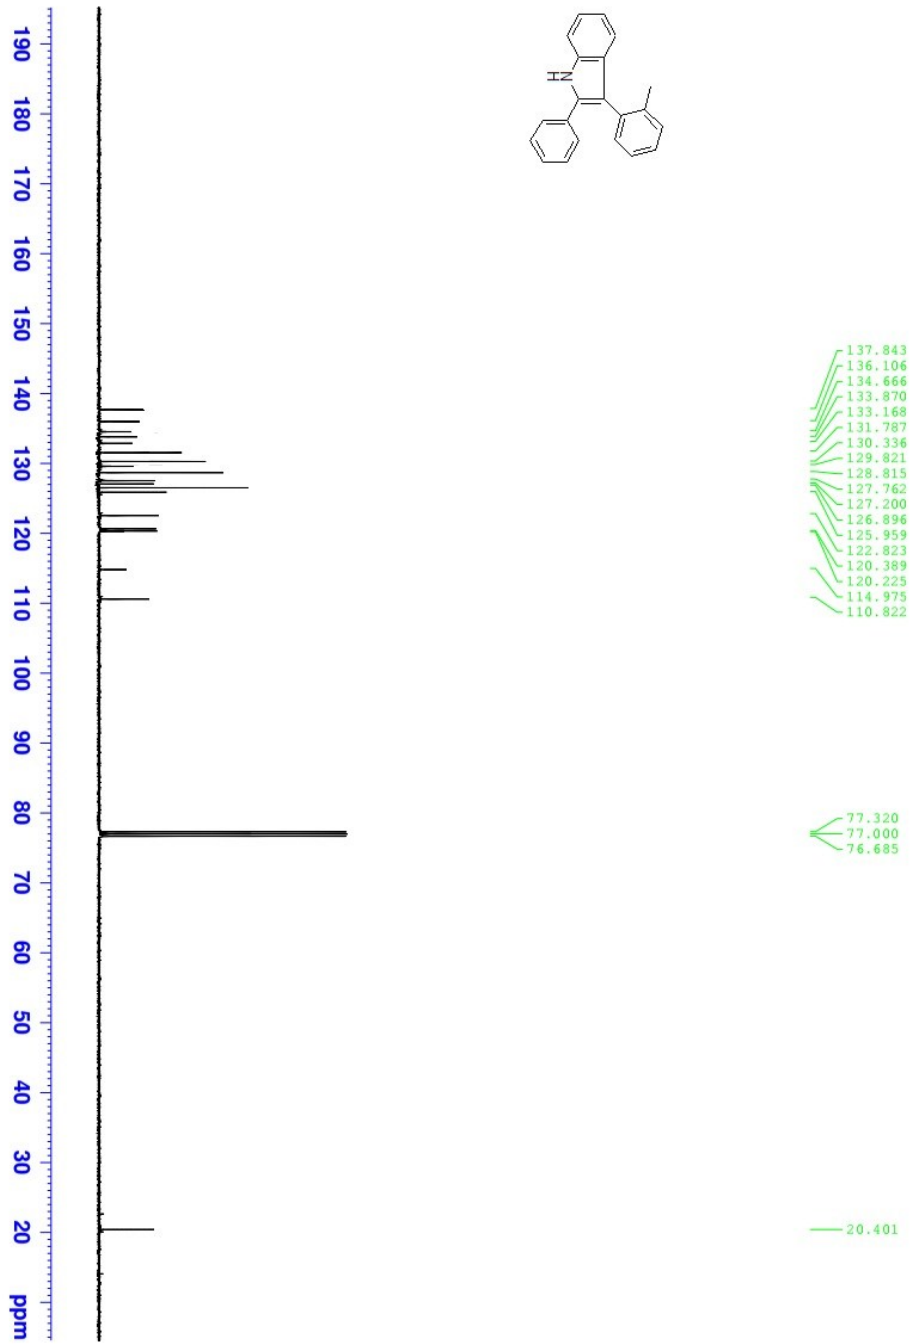

<sup>13</sup>C NMR of Compound 3af

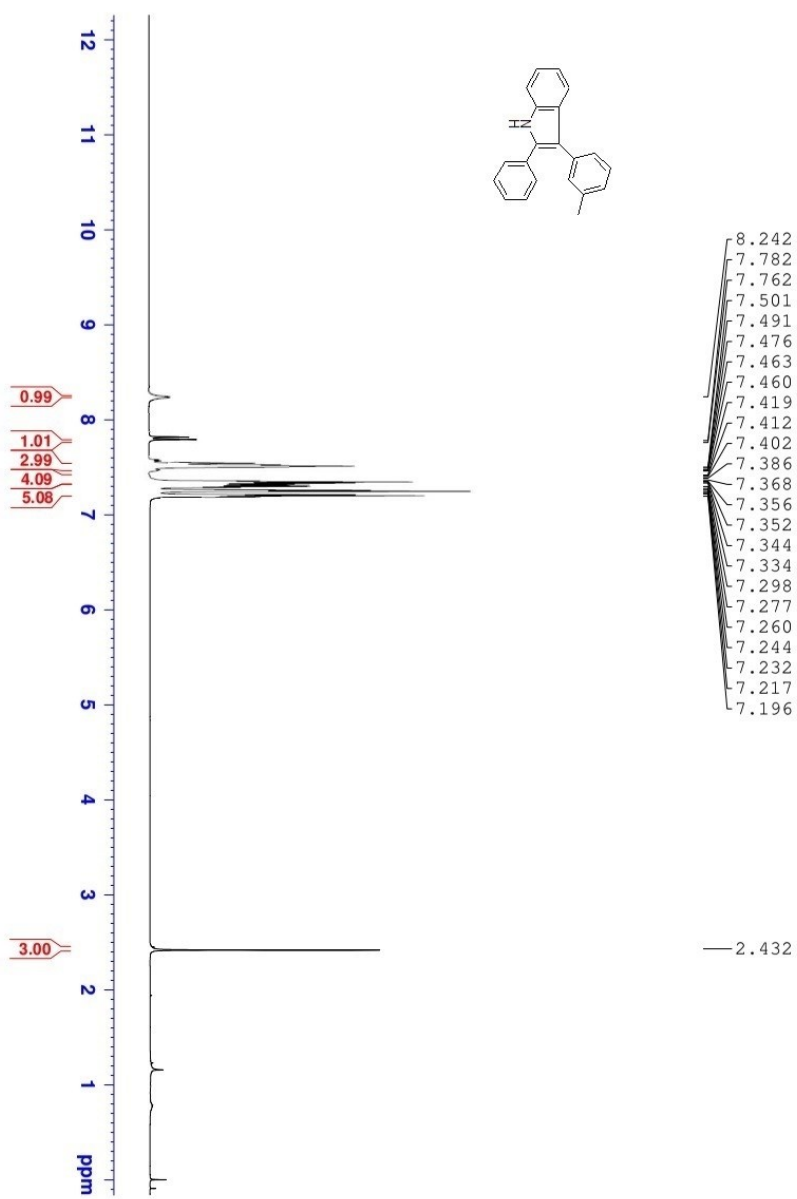

**<sup>1</sup>H NMR of Compound 3ag**

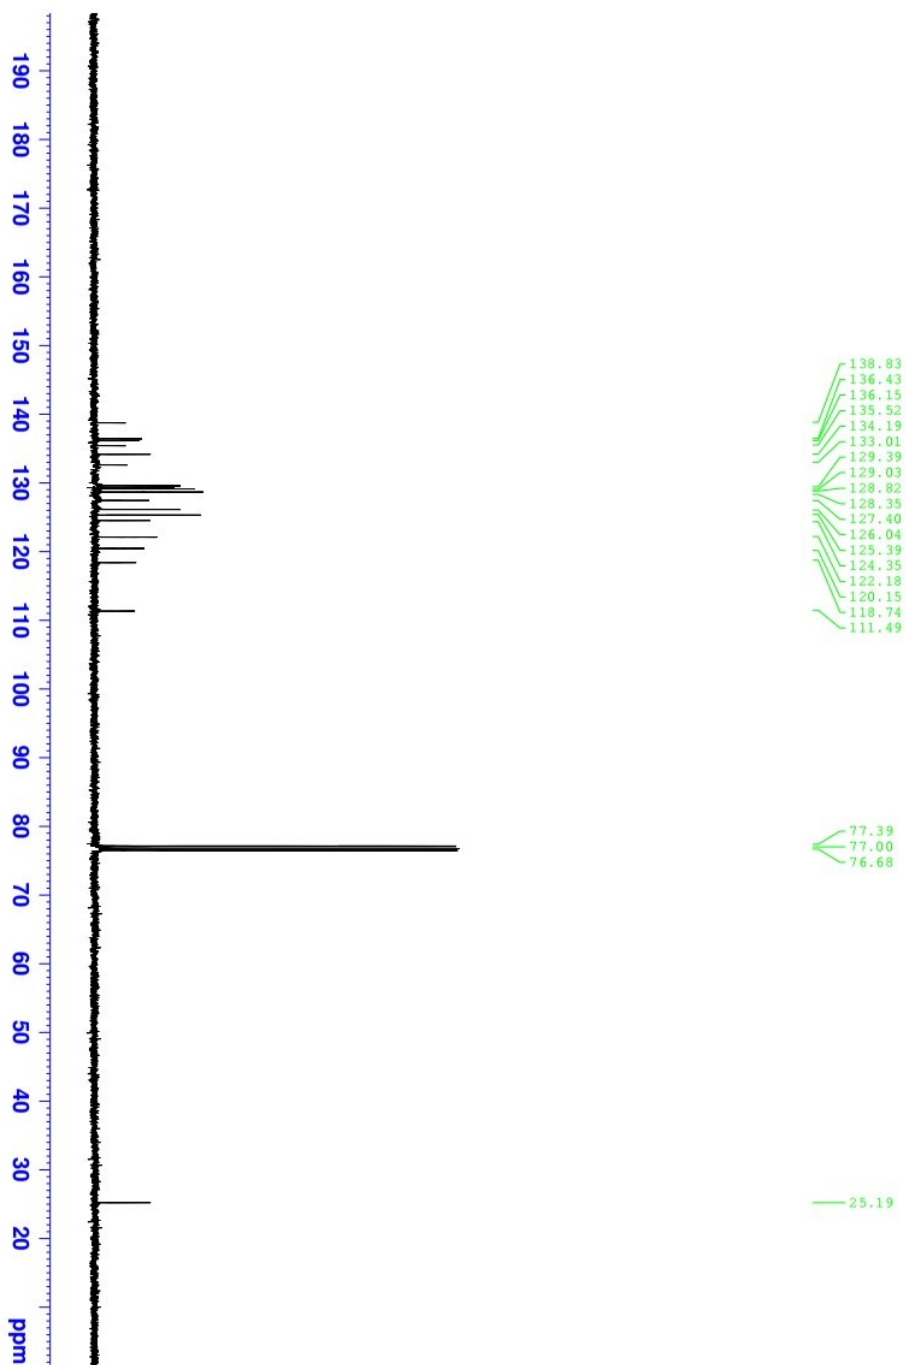

<sup>13</sup>C NMR of Compound 3ag

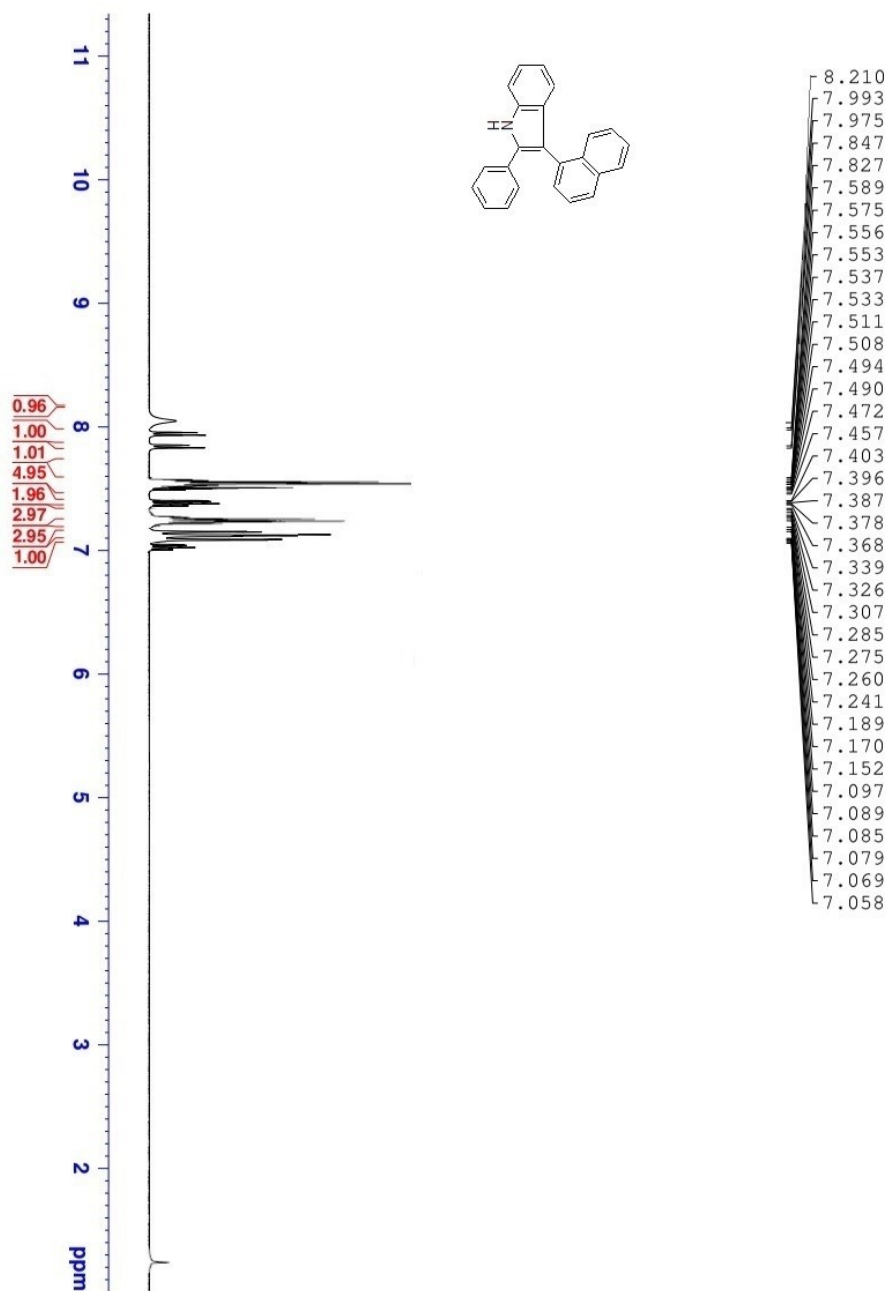

**<sup>1</sup>H NMR of Compound 3ah**



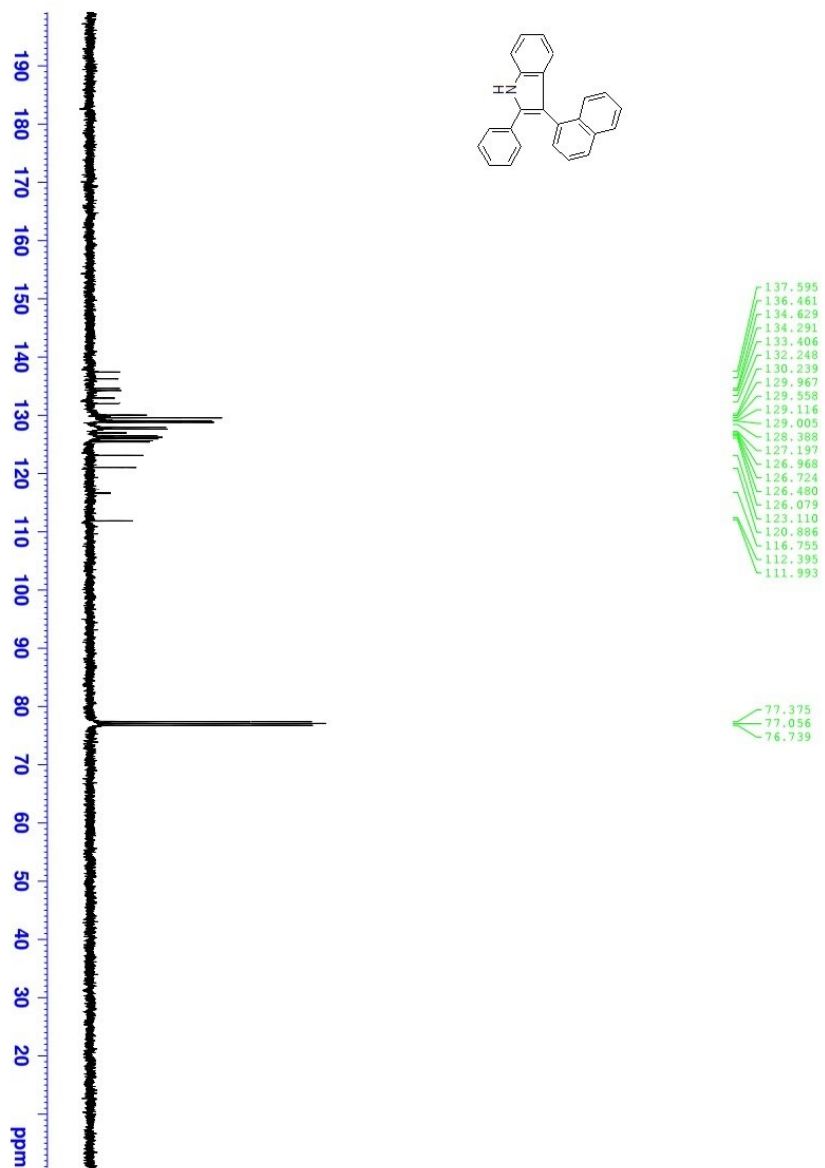

<sup>13</sup>C NMR of Compound 3ah

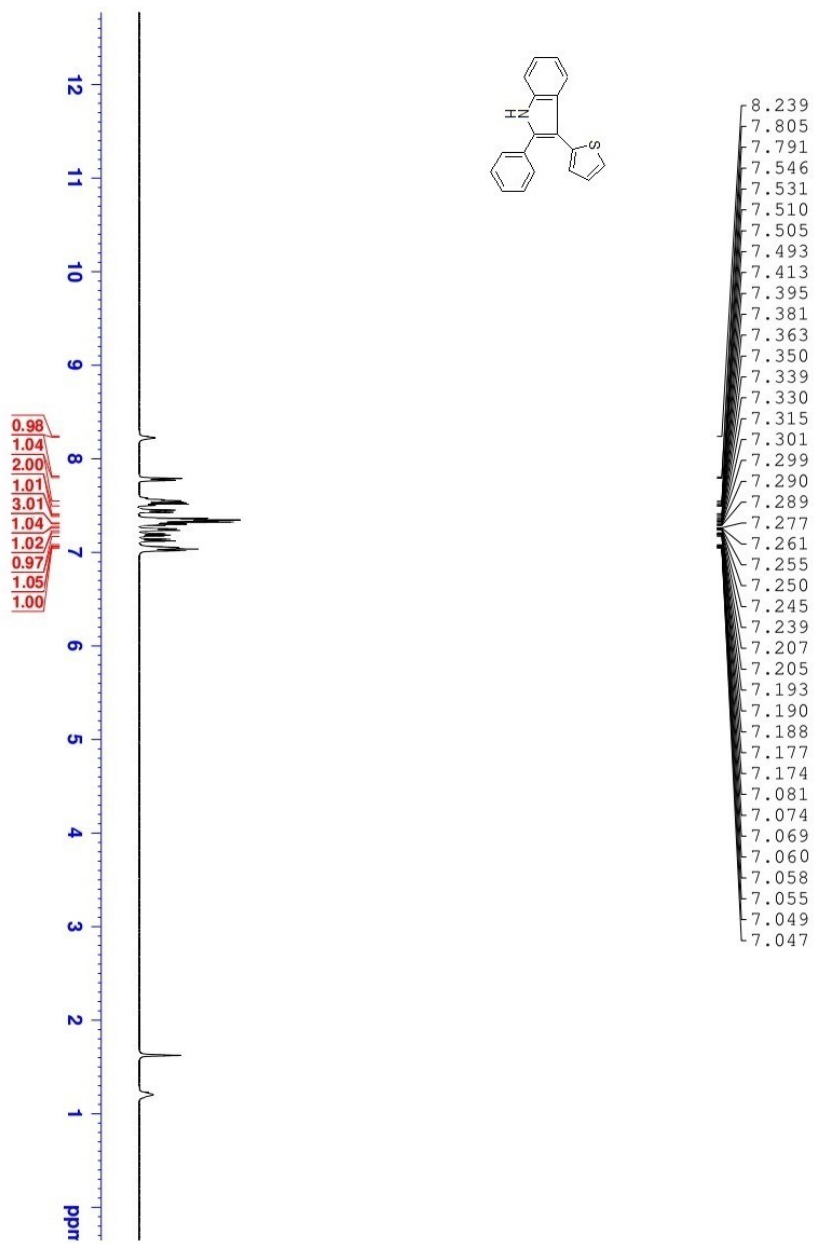

**<sup>1</sup>H NMR of Compound 3ai**

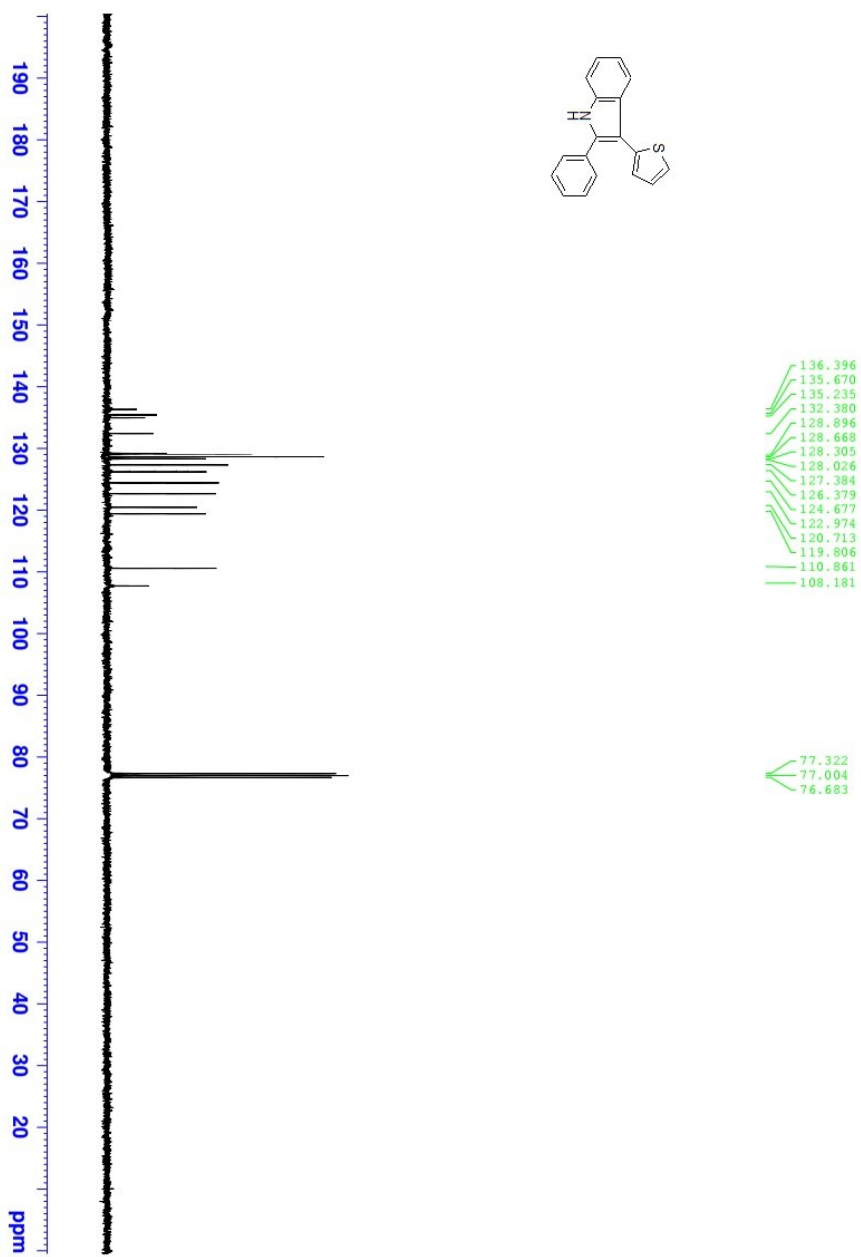

<sup>13</sup>C NMR of Compound 3ai

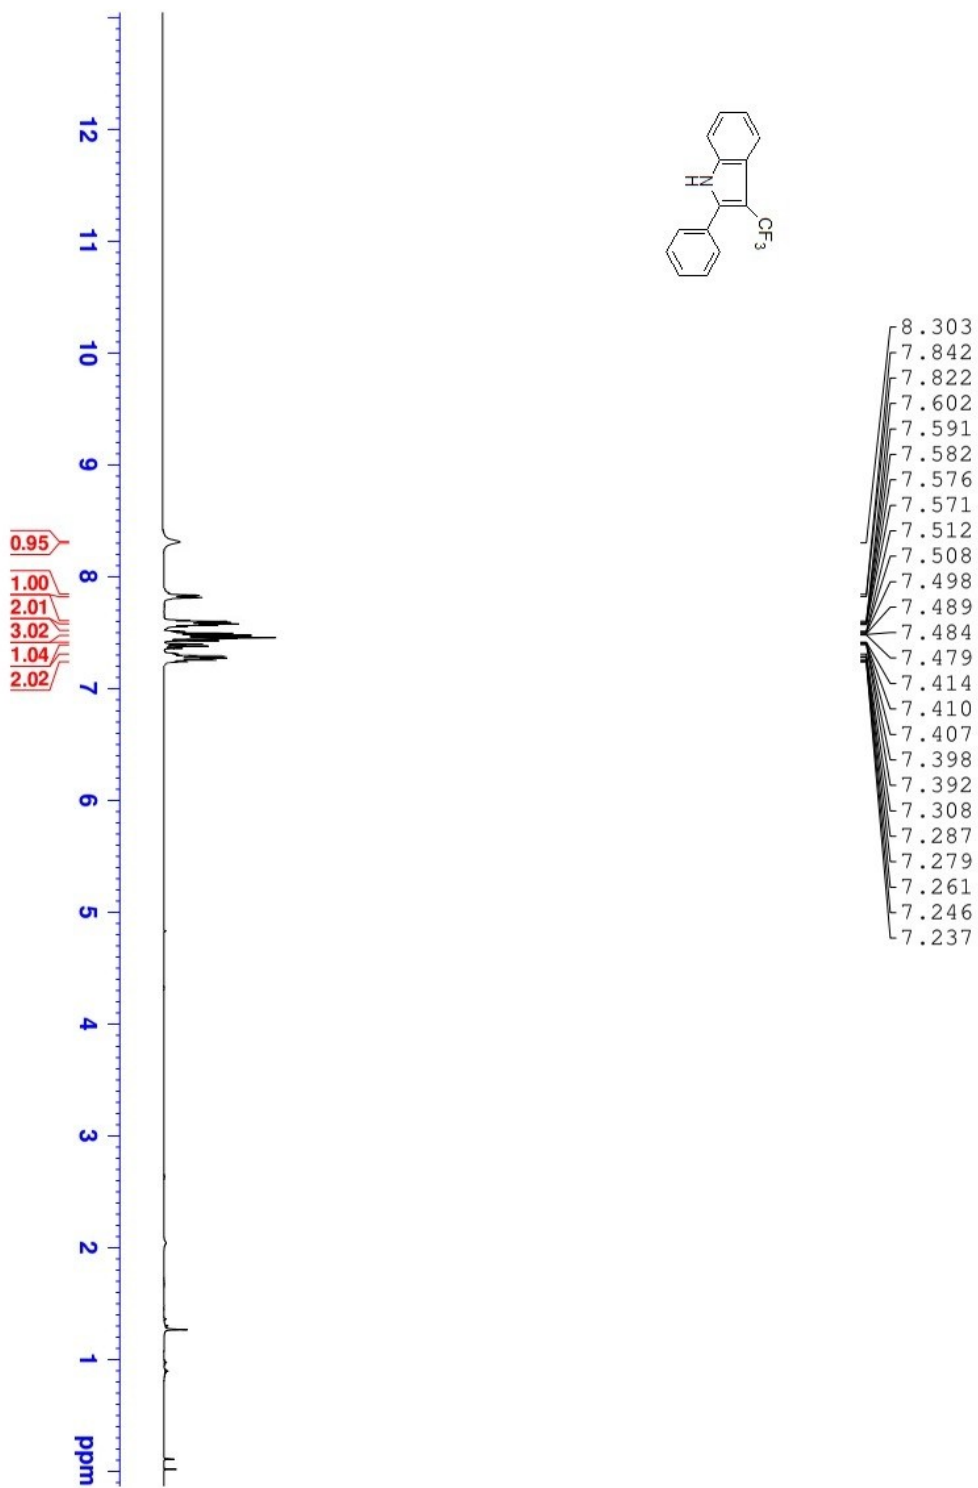

**<sup>1</sup>H NMR of Compound 3aj**

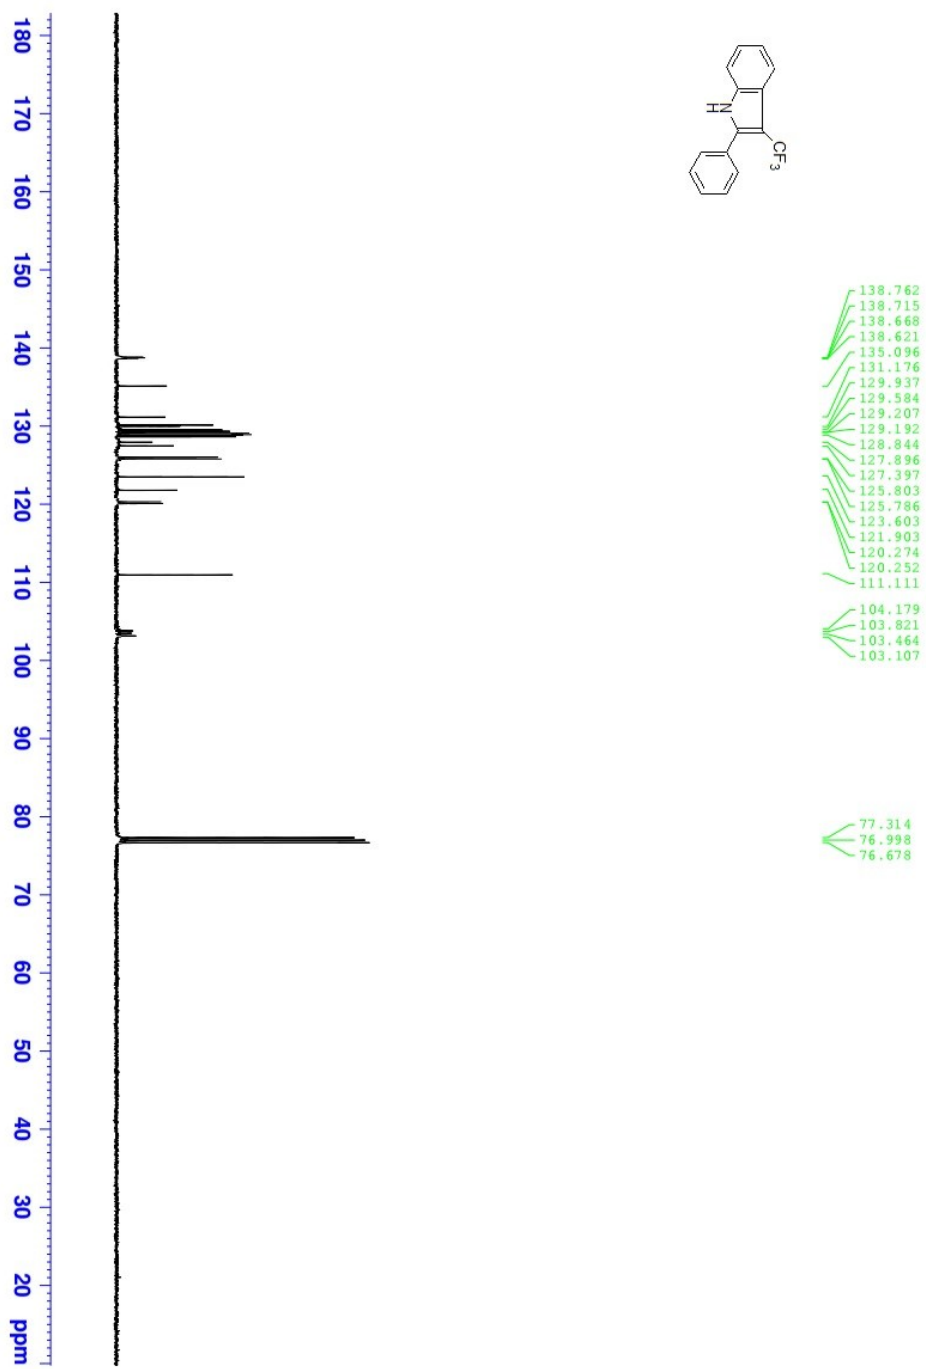

<sup>13</sup>C NMR of Compound 3aj

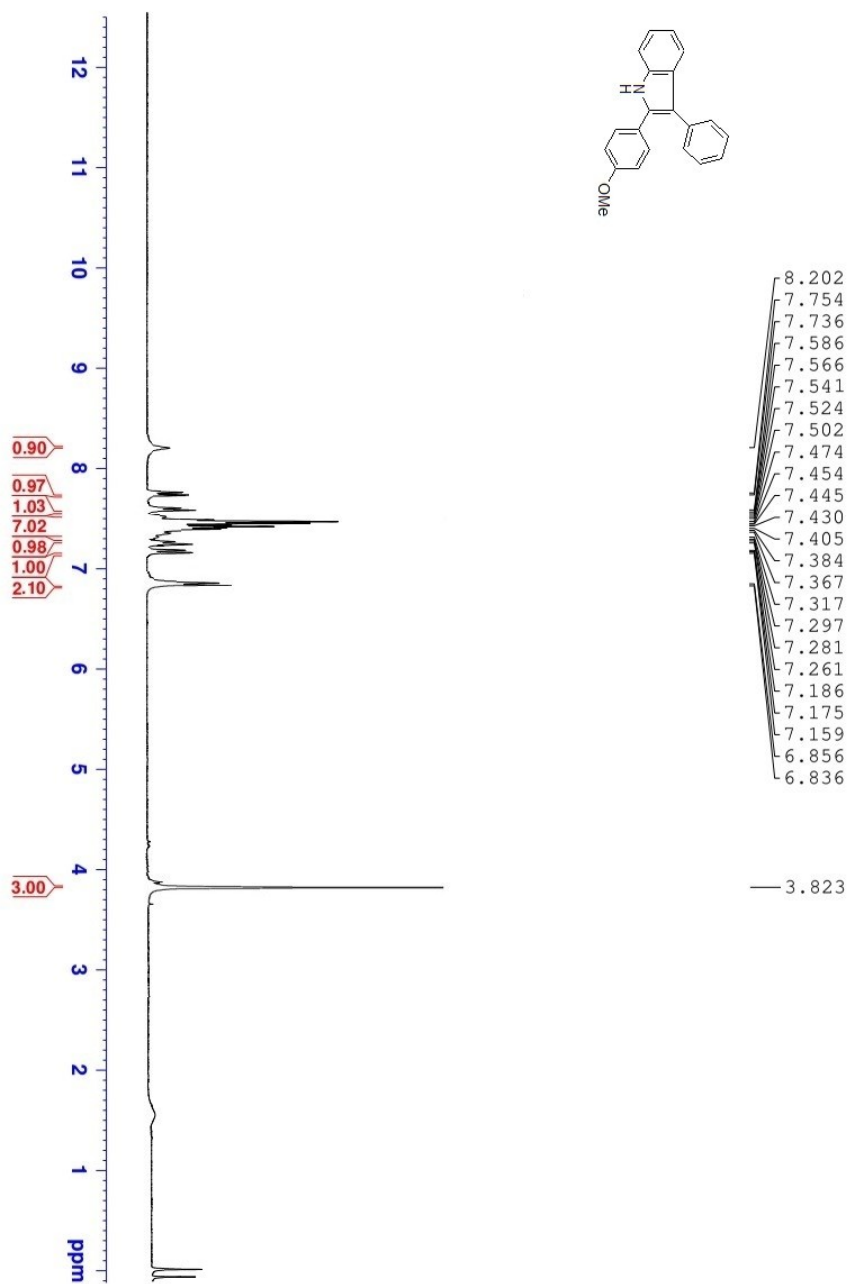

<sup>1</sup>H NMR of Compound 3ba

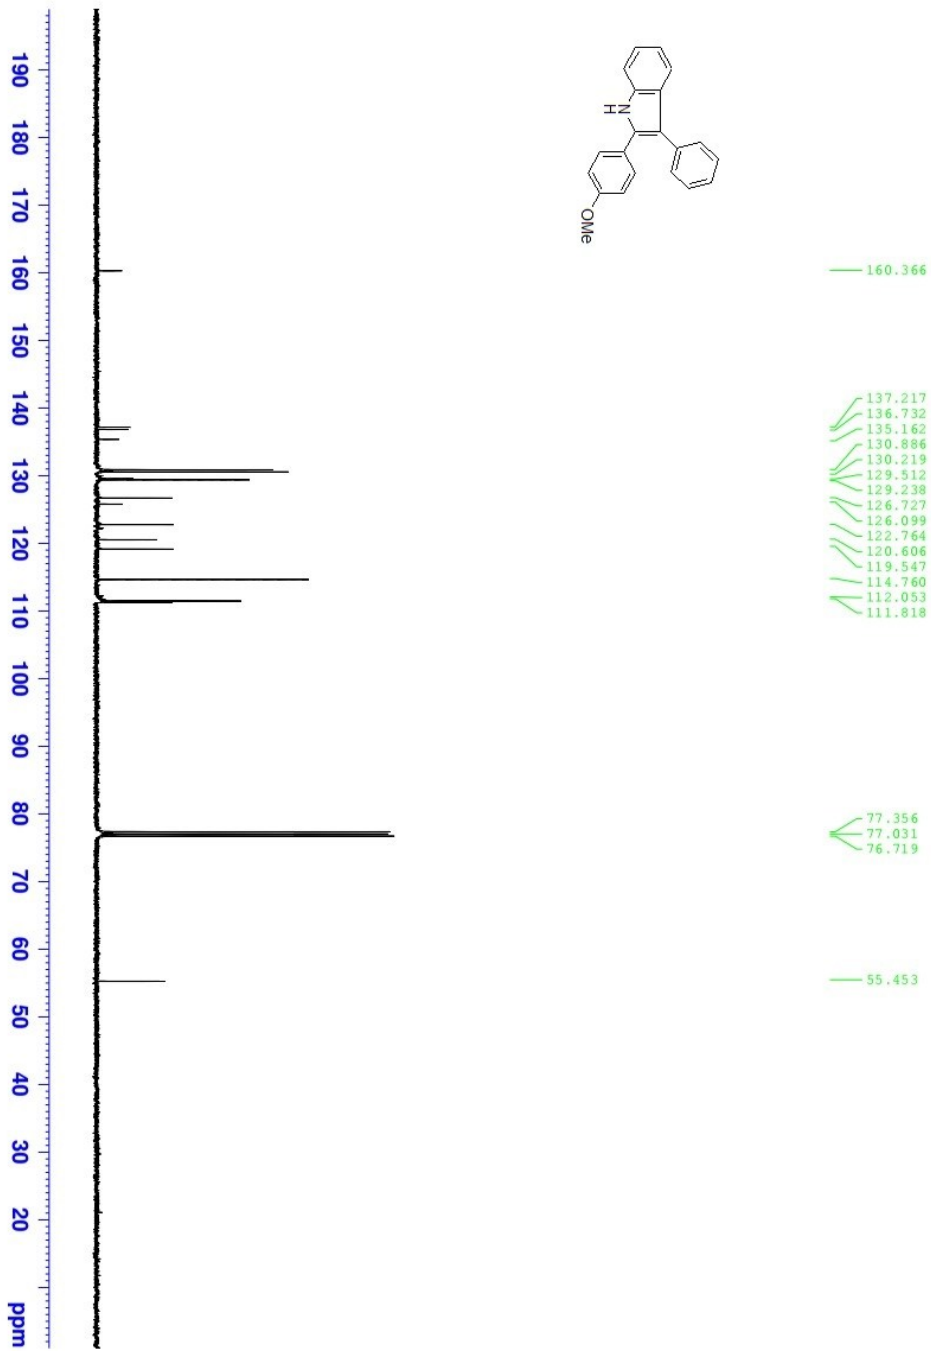

**<sup>13</sup>C NMR of Compound 3ba**

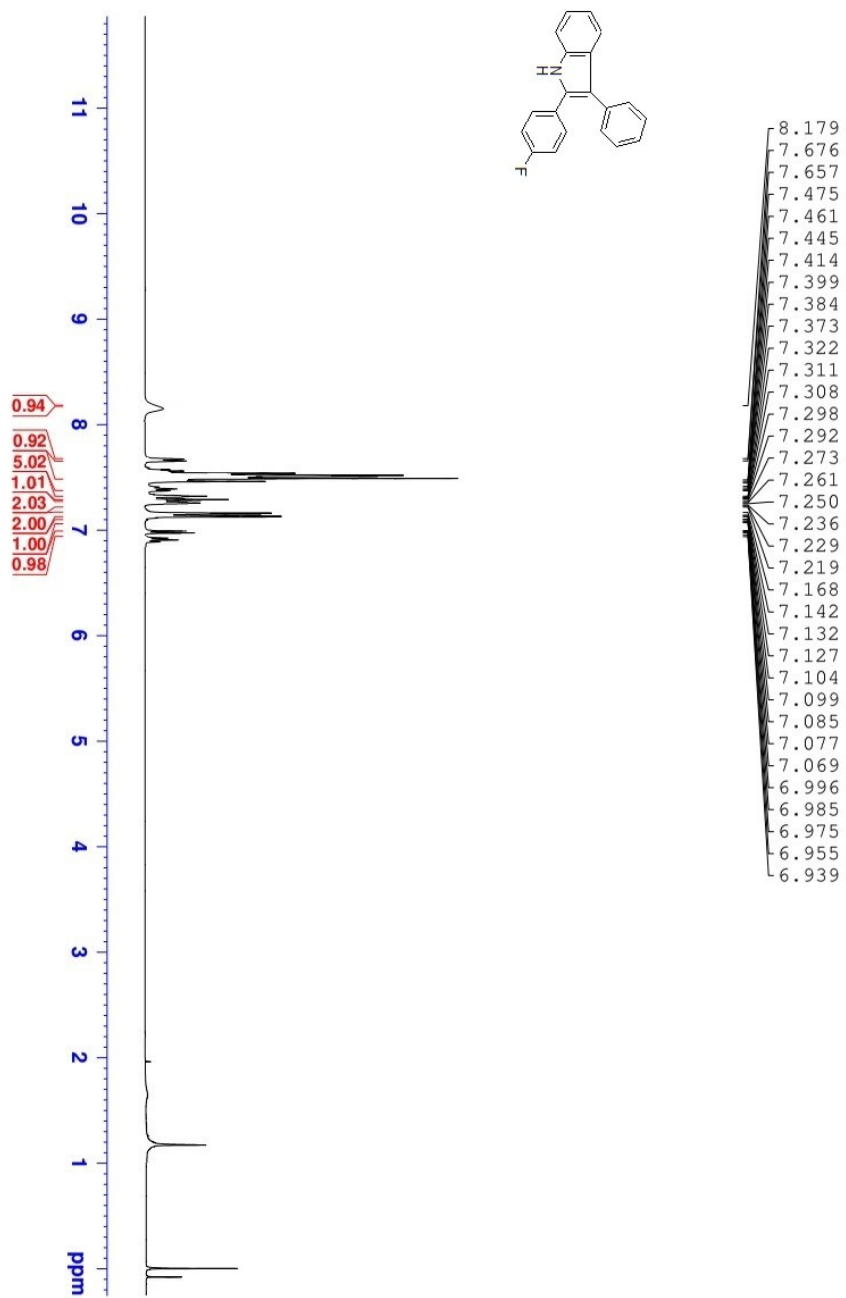

**<sup>1</sup>H NMR of Compound 3ca**



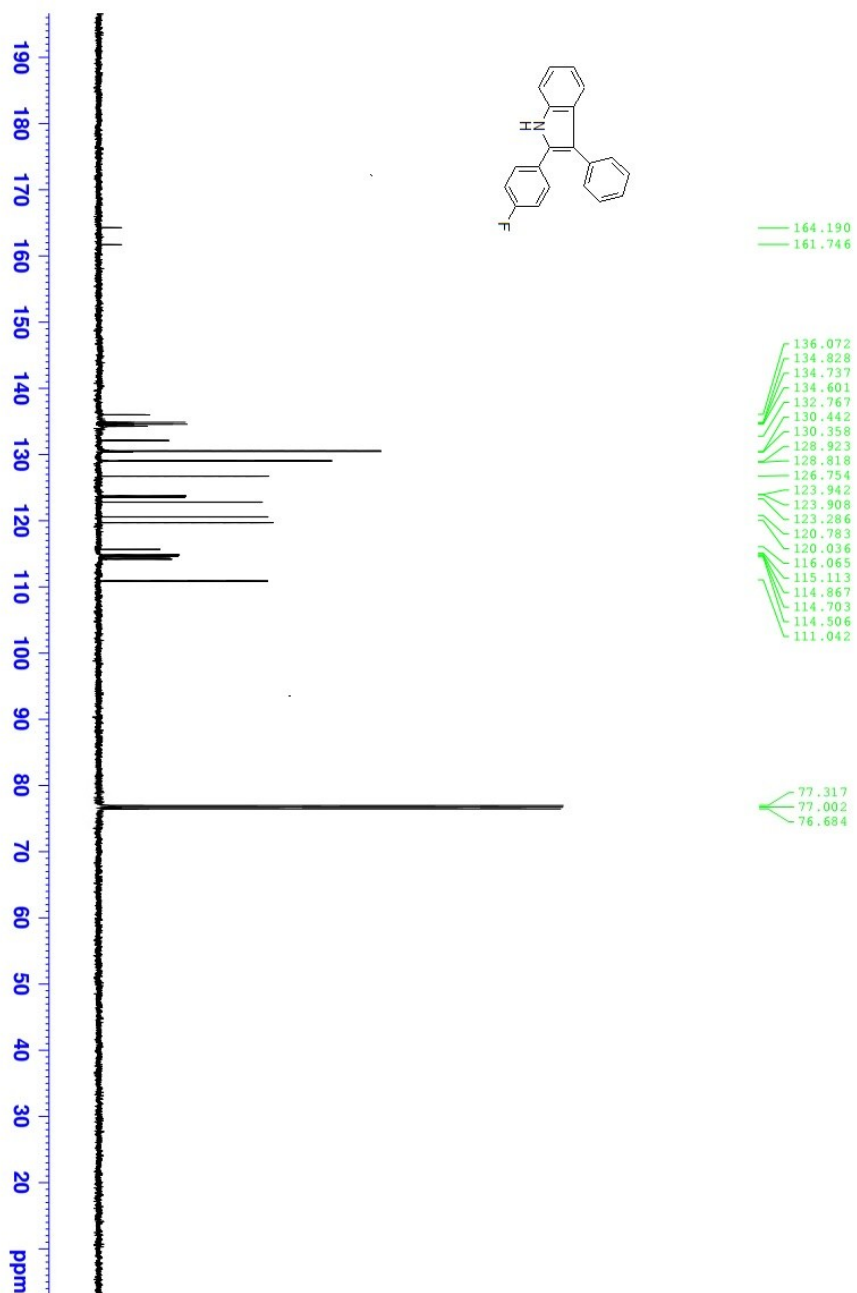

<sup>13</sup>C NMR of Compound 3ca

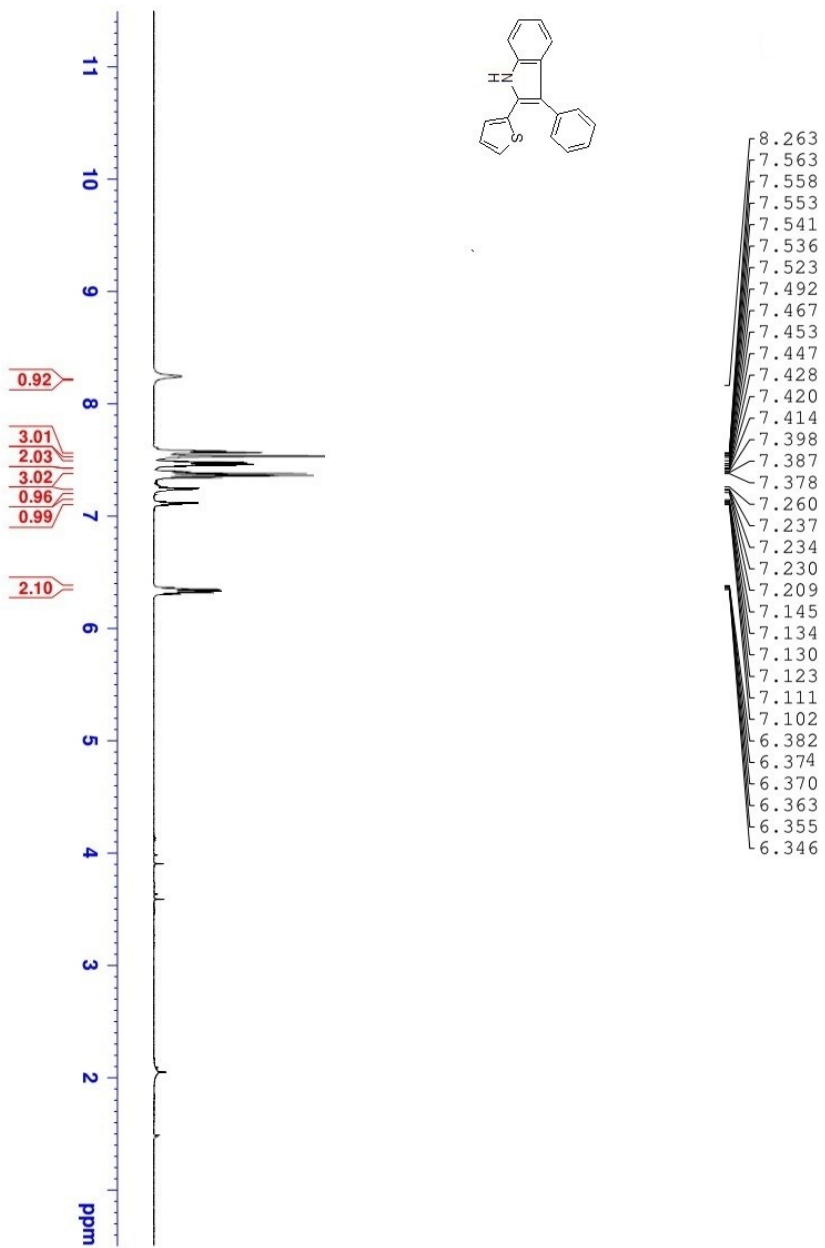

<sup>1</sup>H NMR of Compound 3da

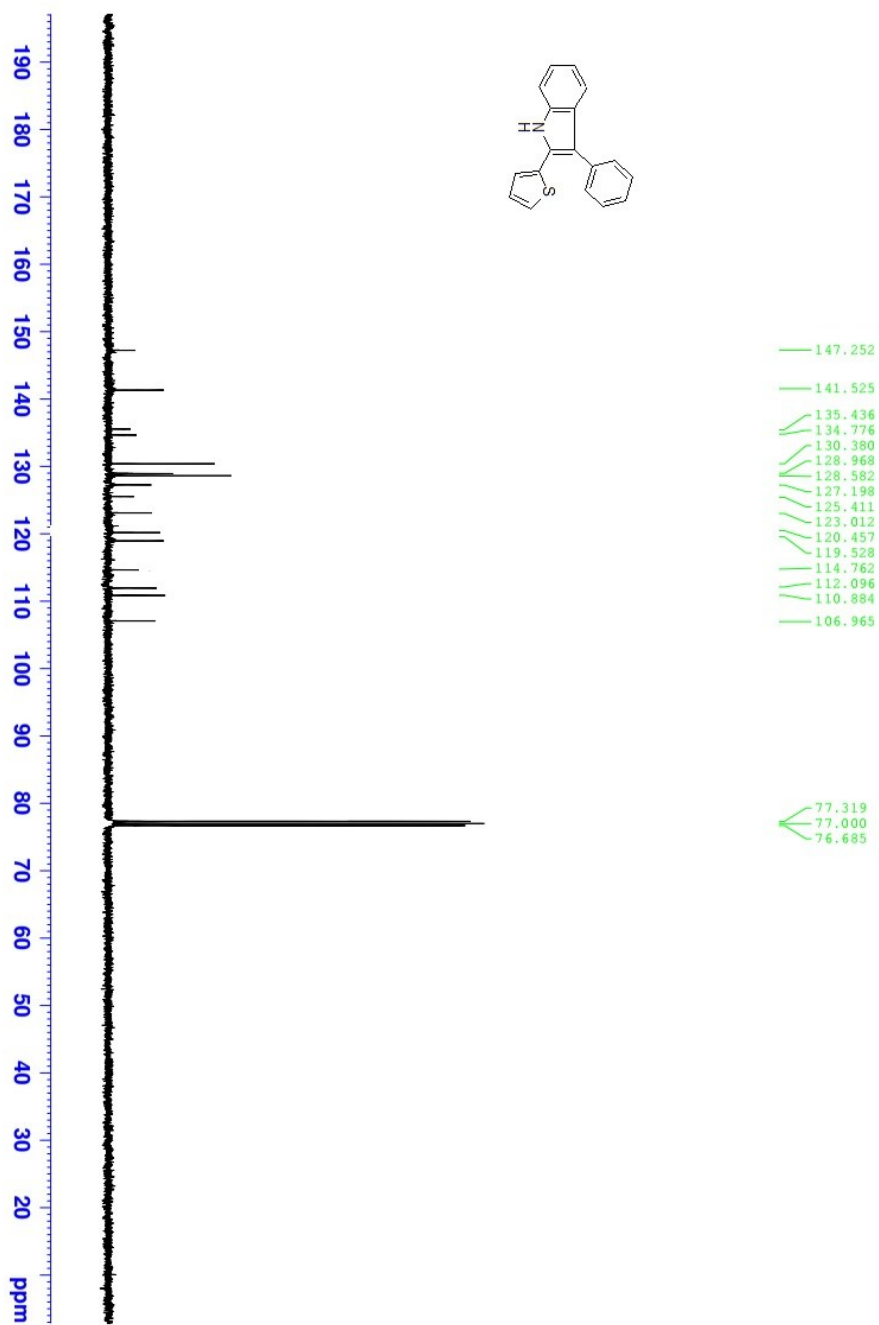

<sup>13</sup>C NMR of Compound 3da

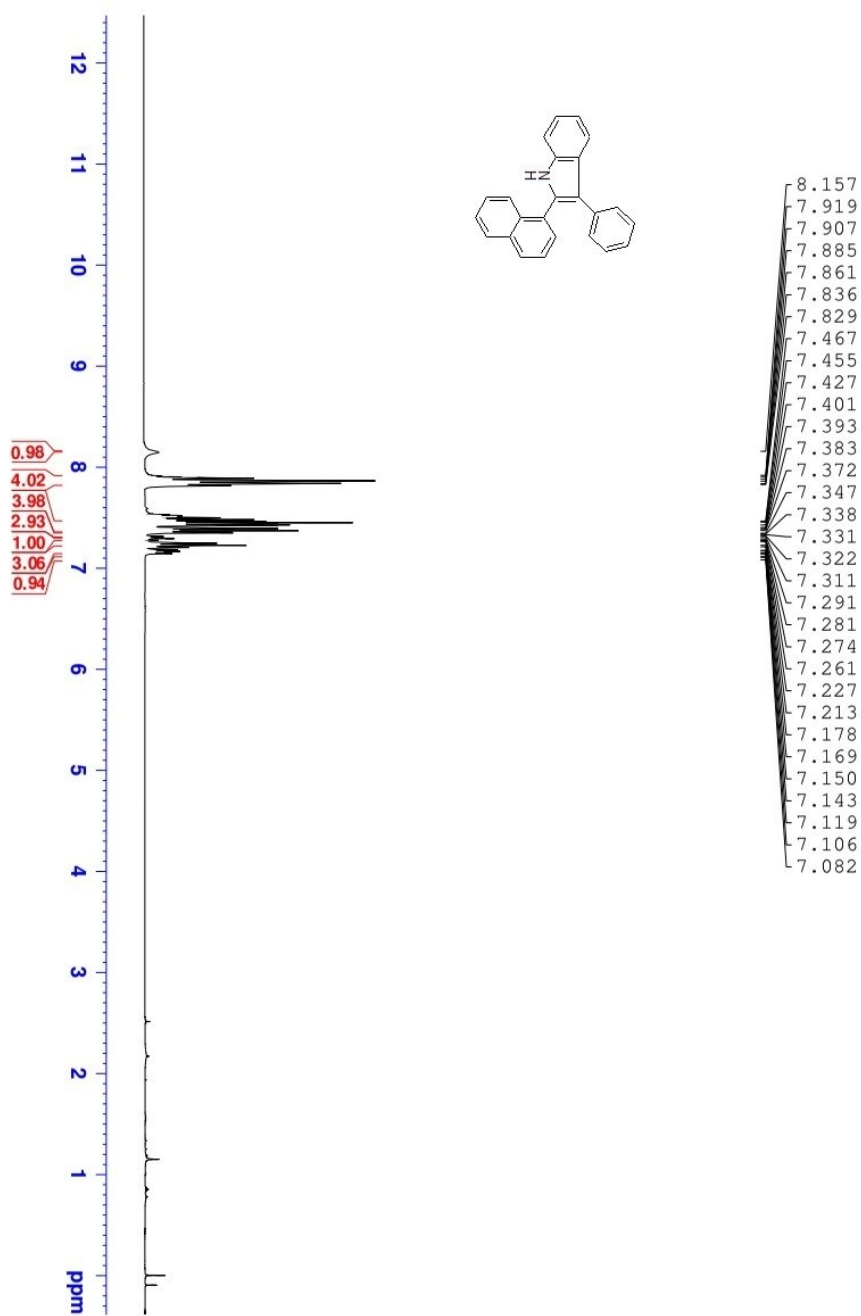

**<sup>1</sup>H NMR of Compound 3ea**

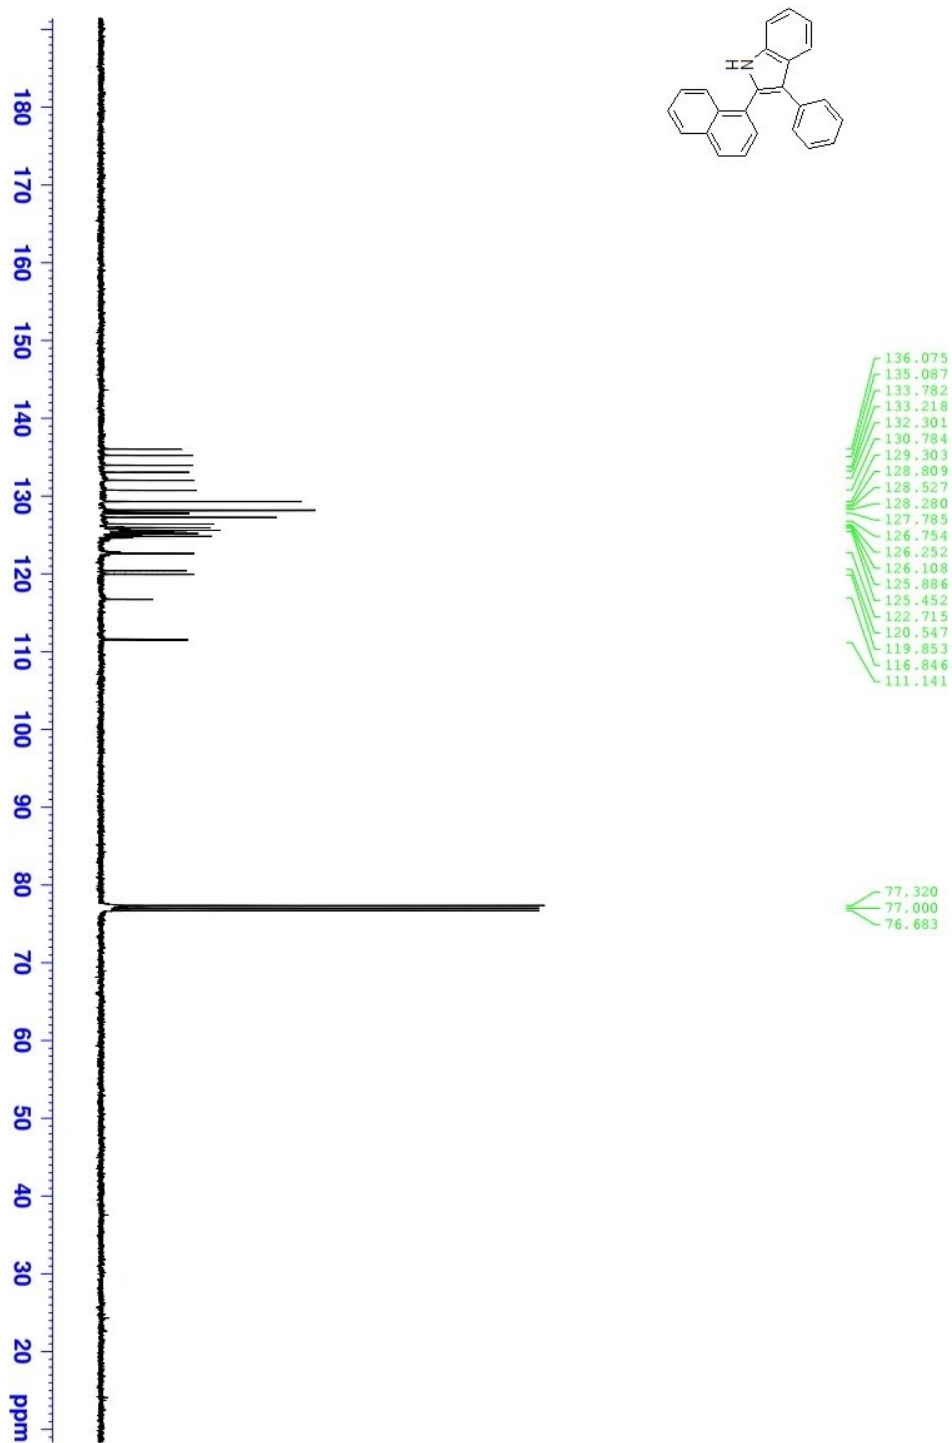

<sup>13</sup>C NMR of Compound 3ea

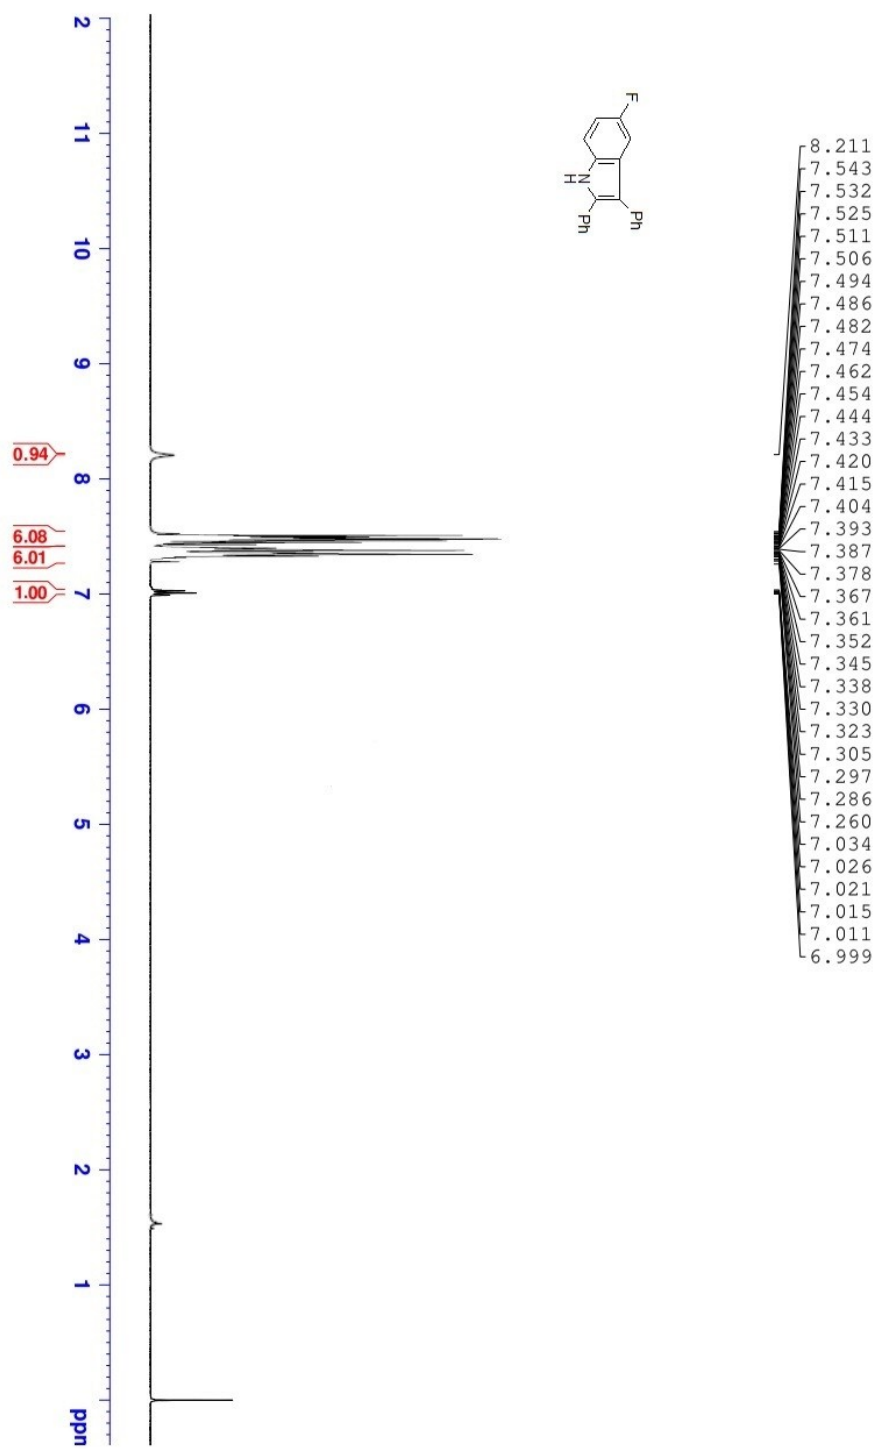

<sup>1</sup>H NMR of Compound 3ga

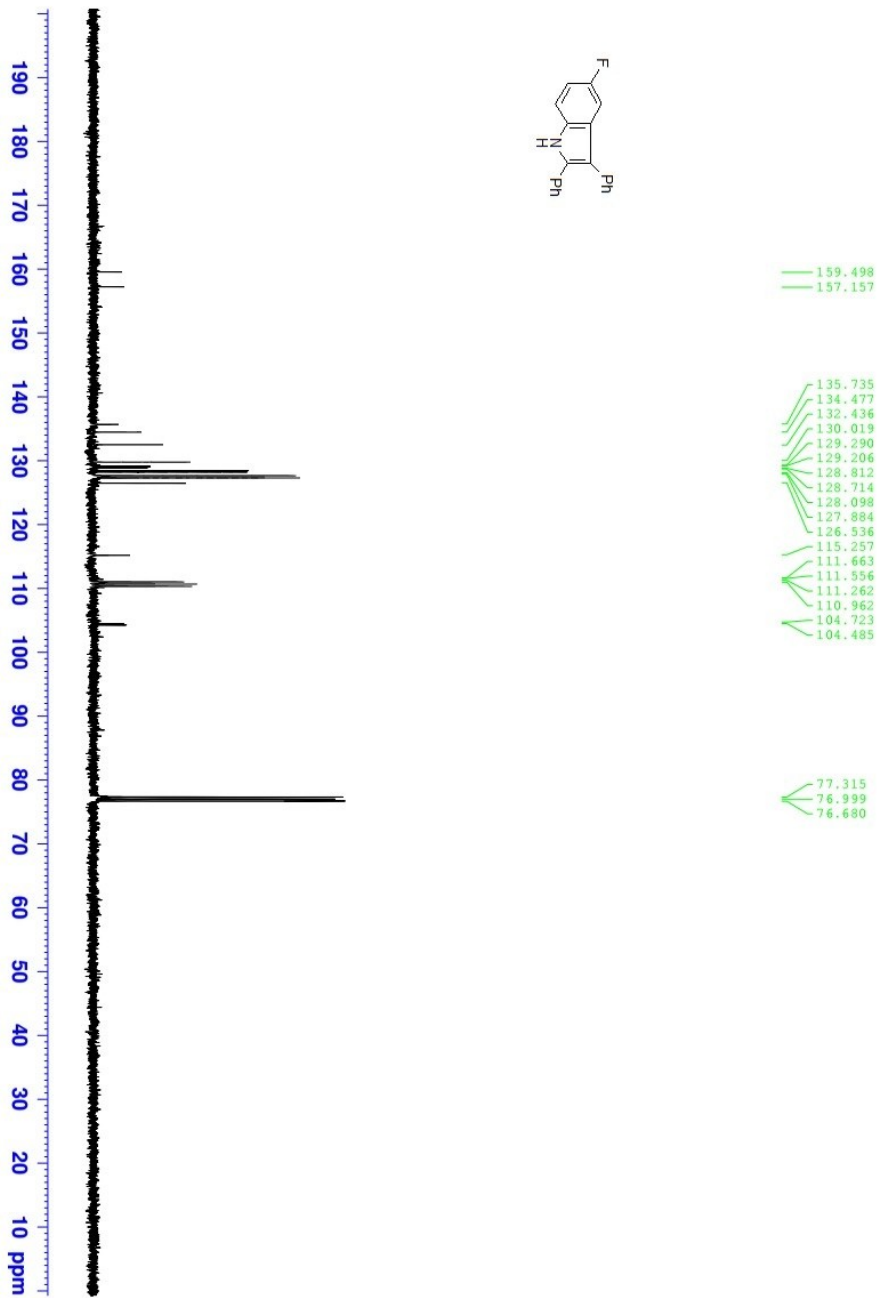

<sup>13</sup>C NMR of Compound 3ga

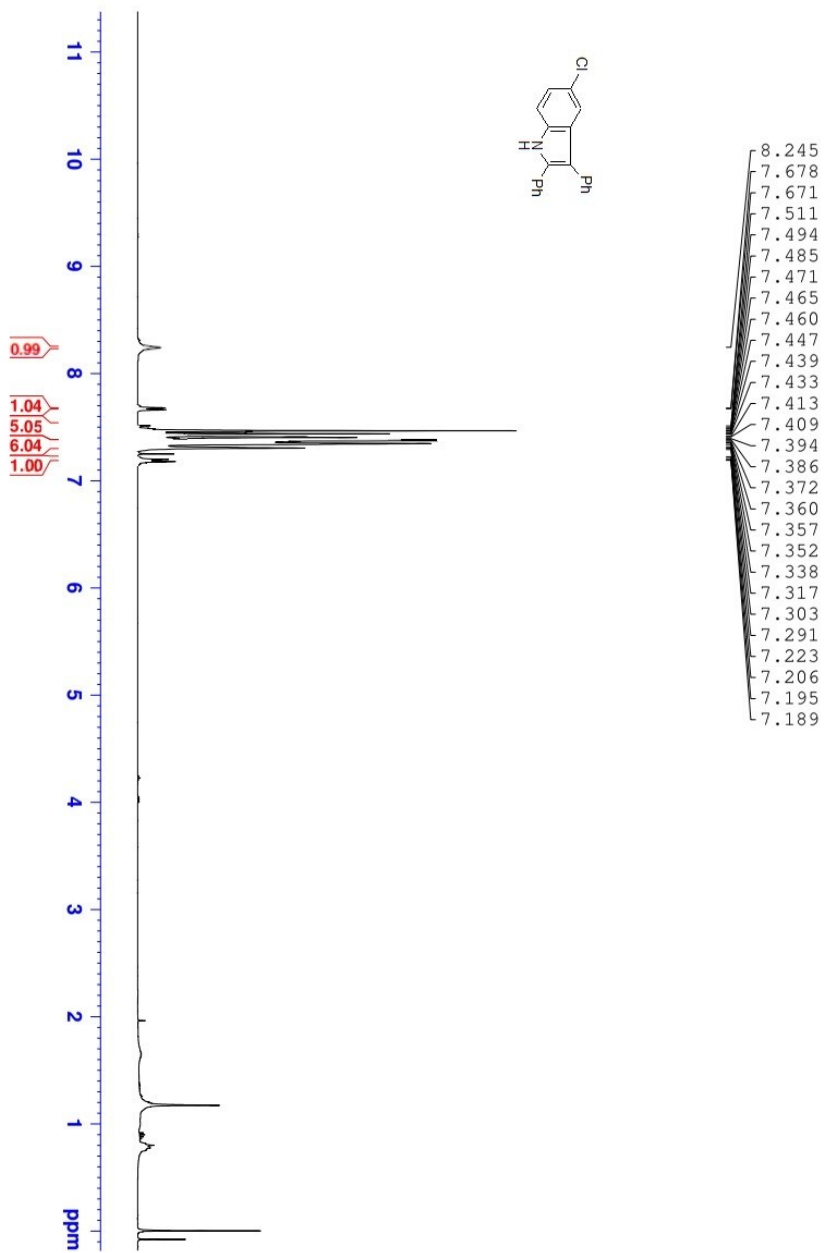

<sup>1</sup>H NMR of Compound 3ha



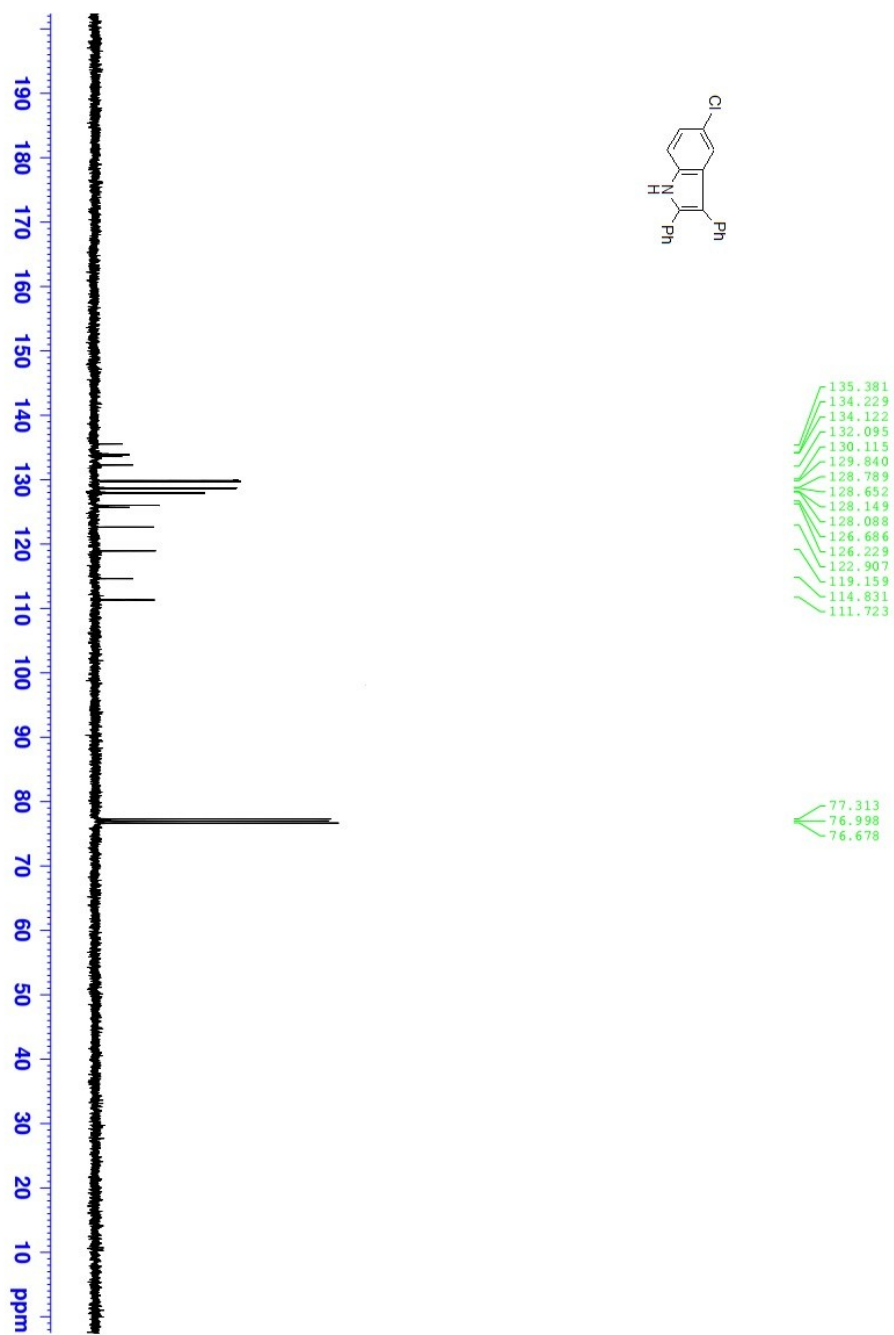

<sup>13</sup>C NMR of Compound 3ha

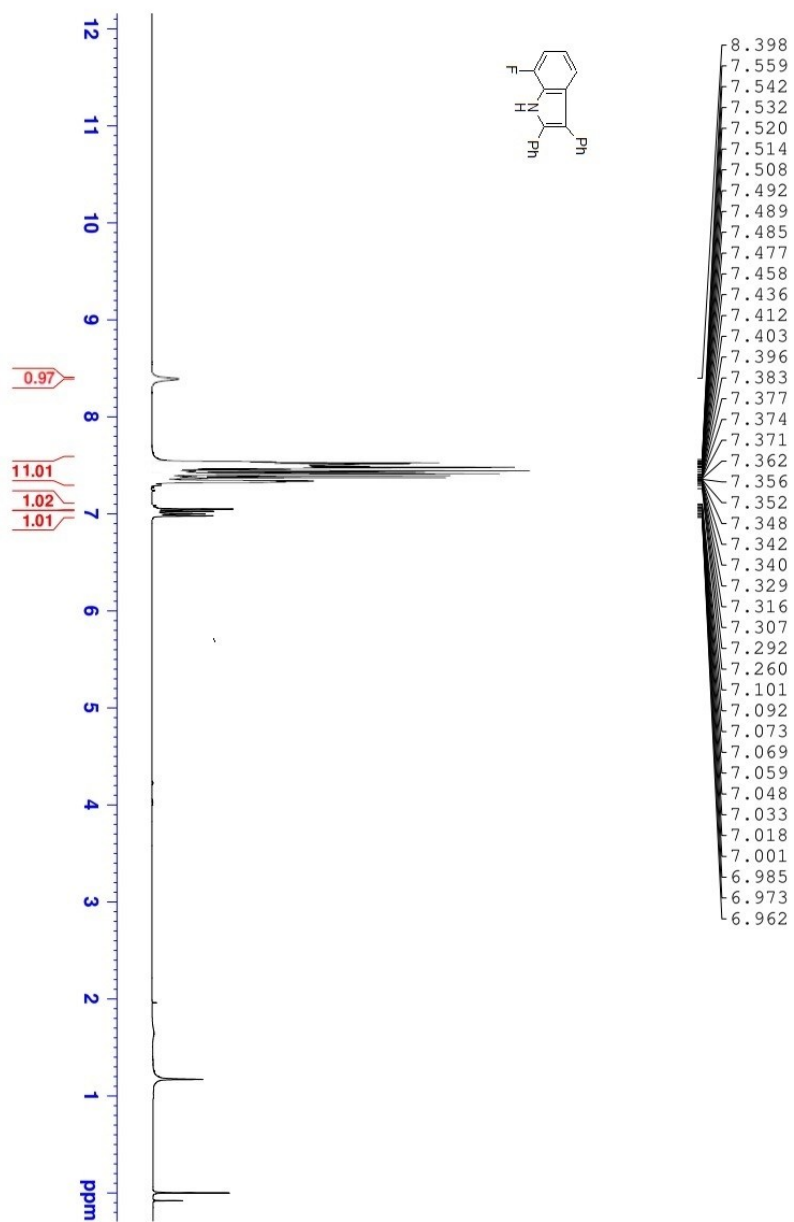

**<sup>1</sup>H NMR of Compound 3ia**

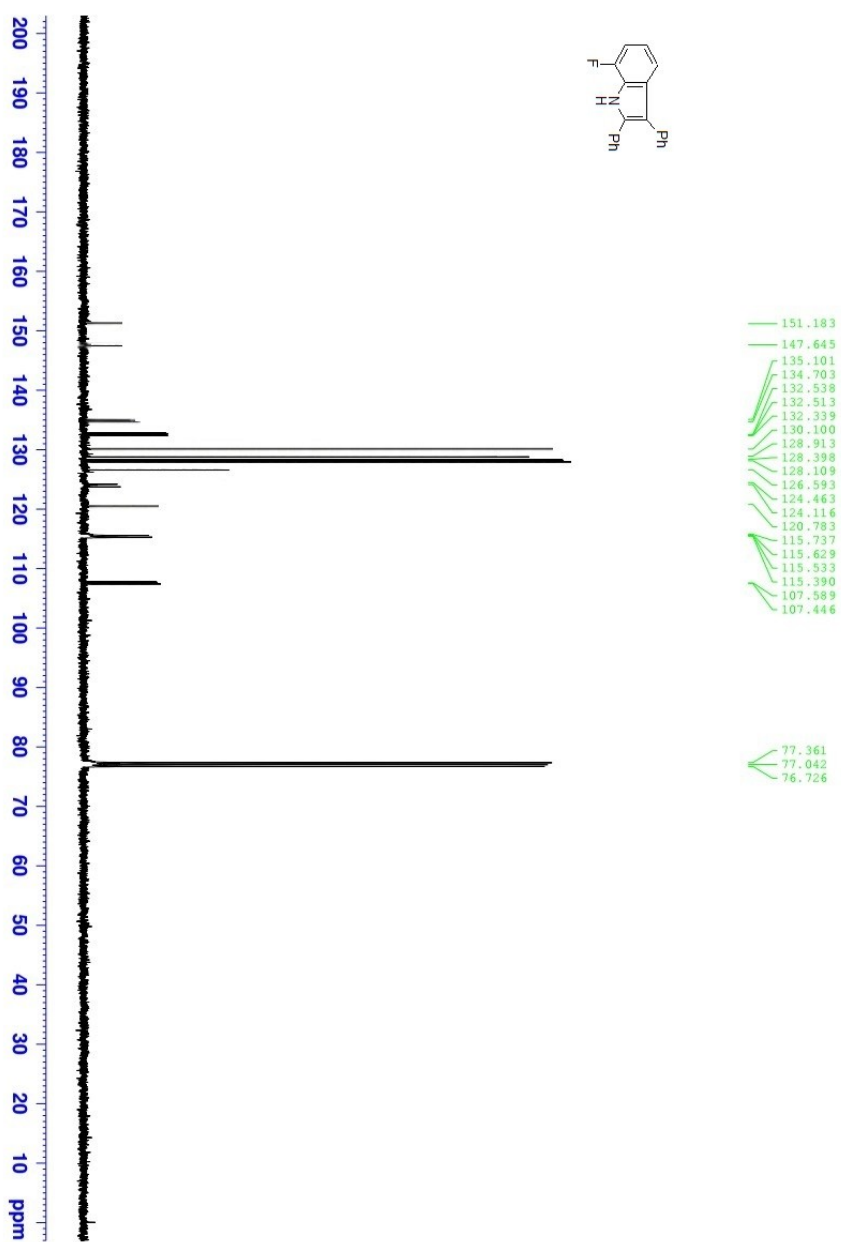

**<sup>13</sup>C NMR of Compound 3ia**

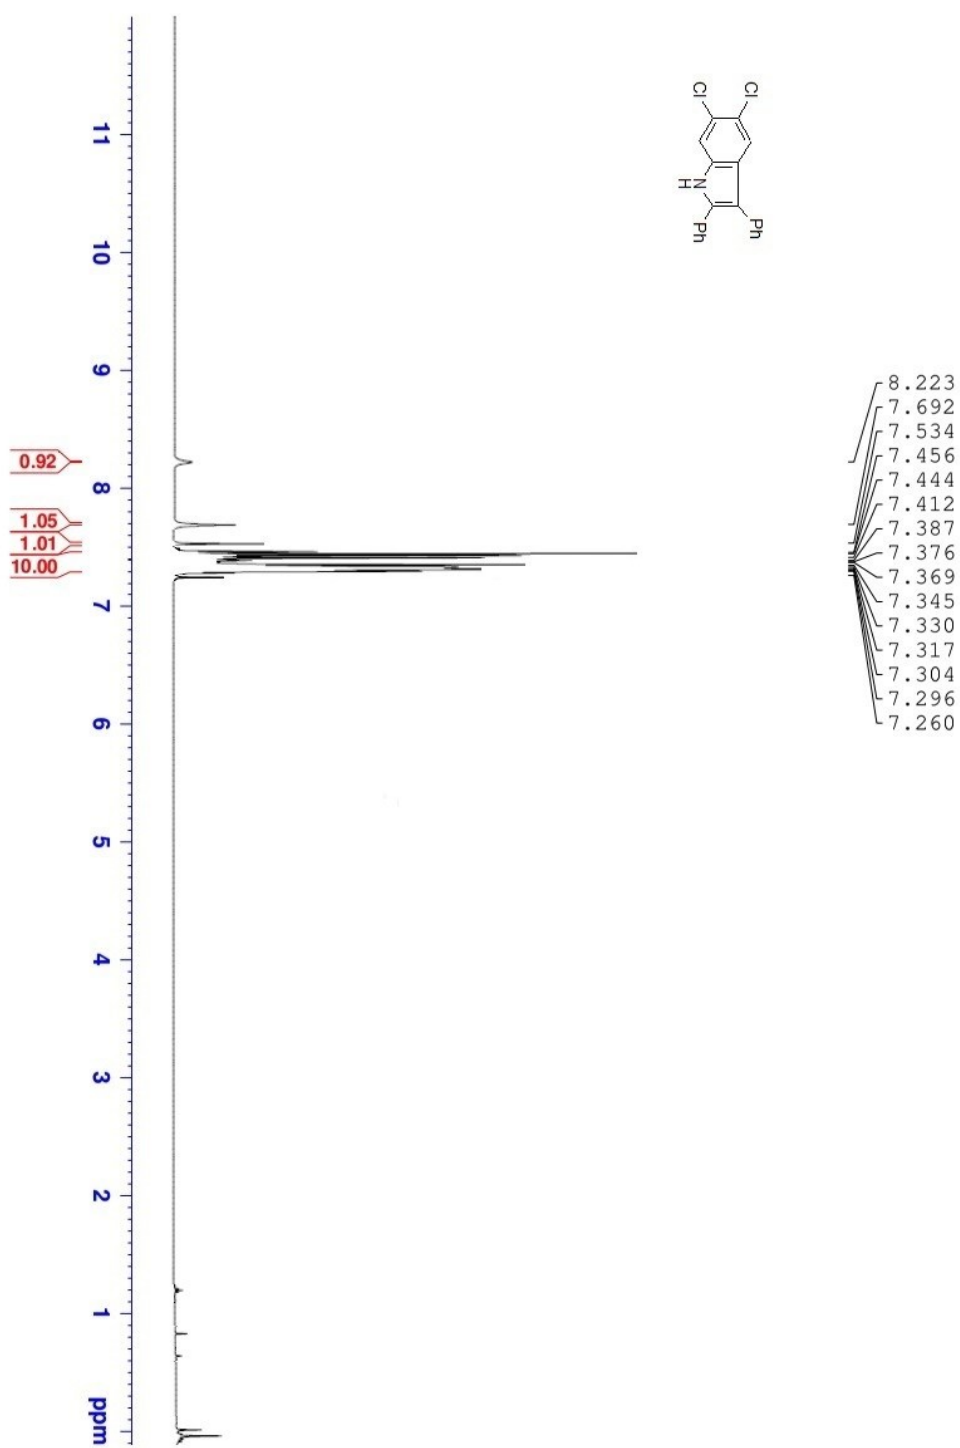

**<sup>1</sup>H NMR of Compound 3ja**

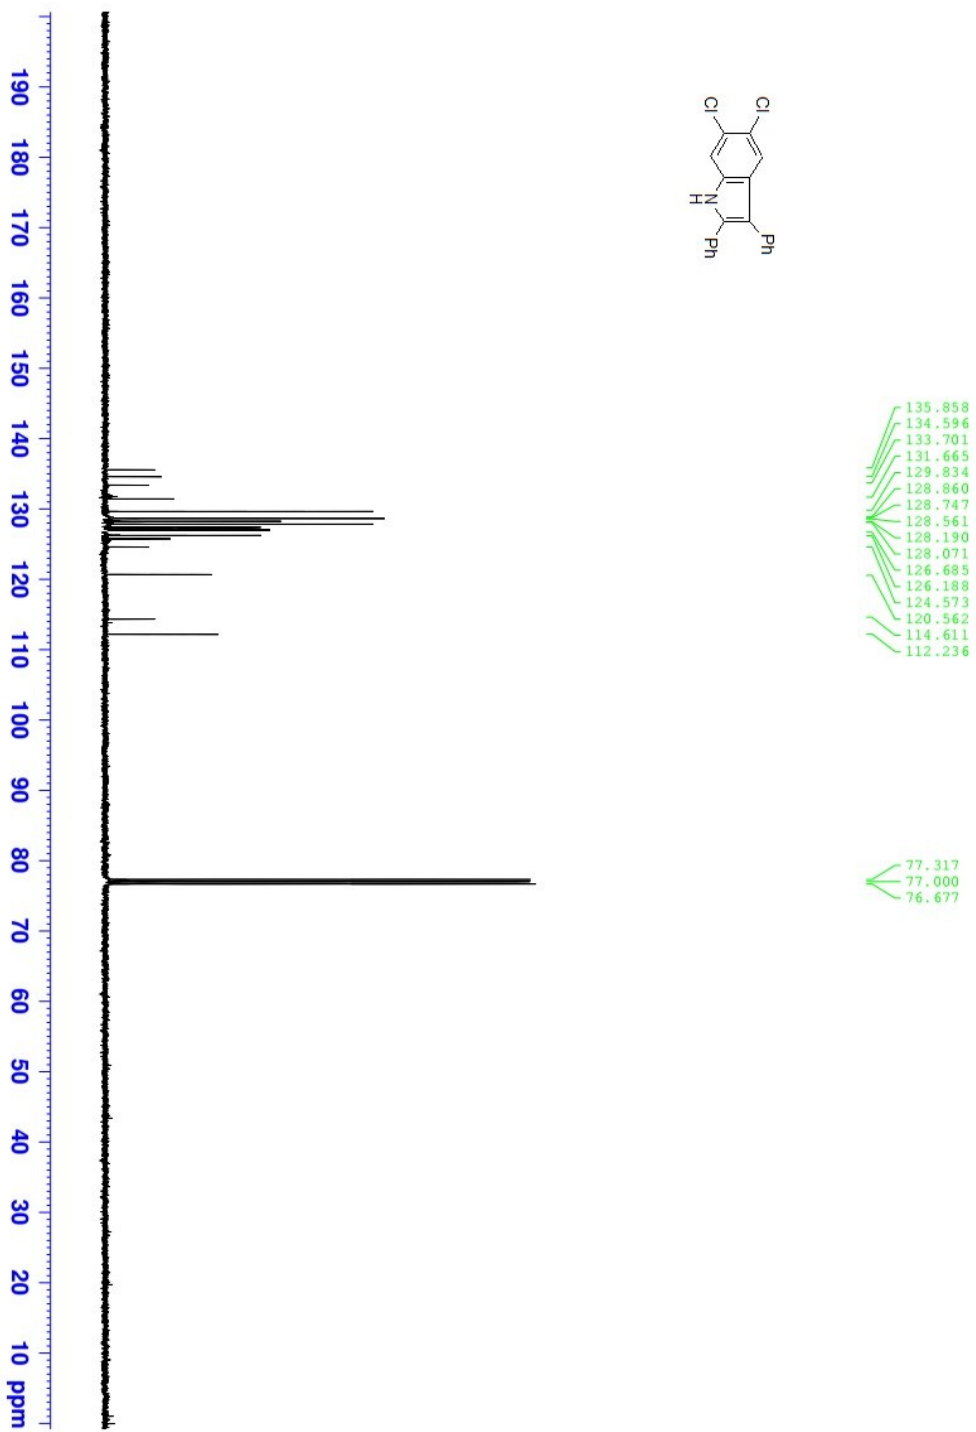

<sup>13</sup>C NMR of Compound 3ja

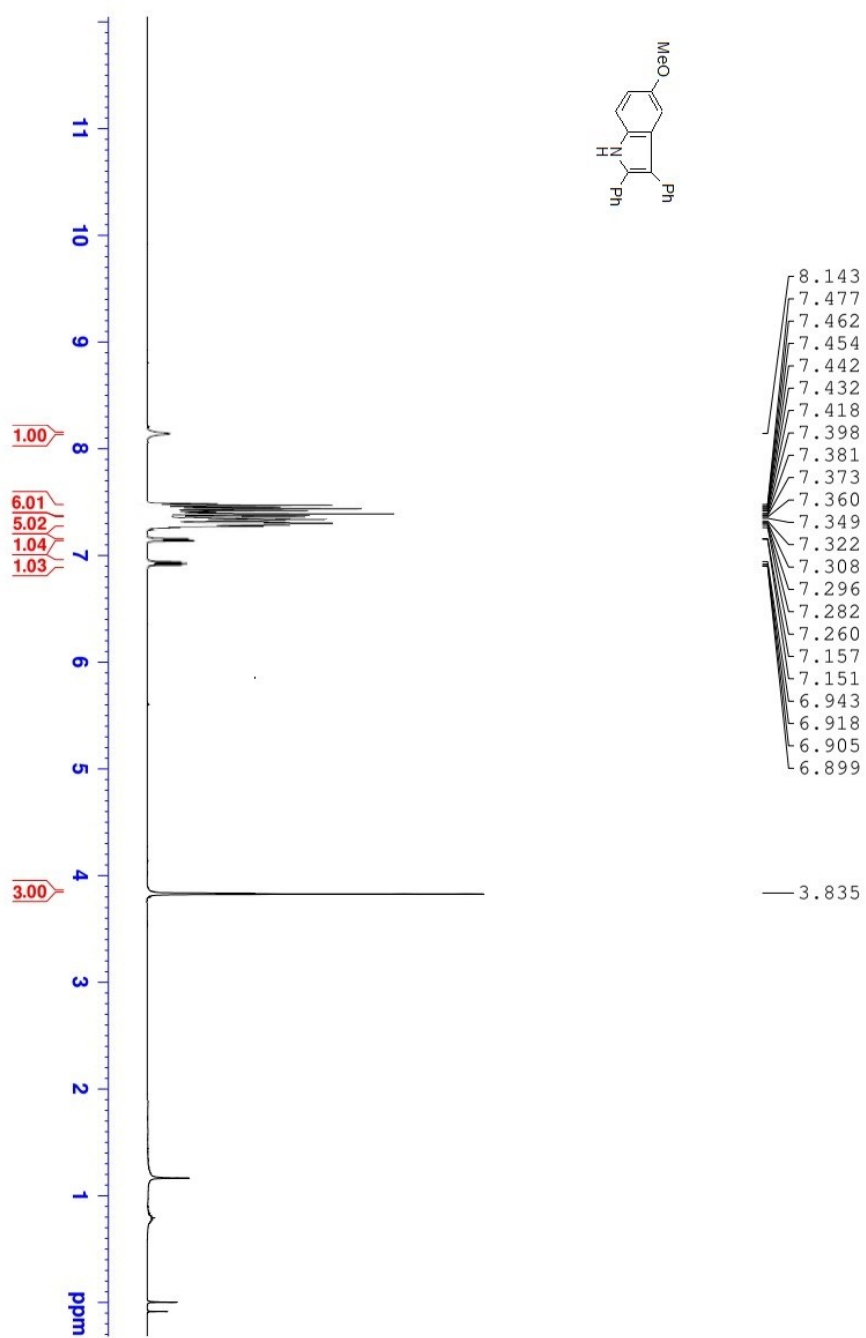

**<sup>1</sup>H NMR of Compound 3ka**

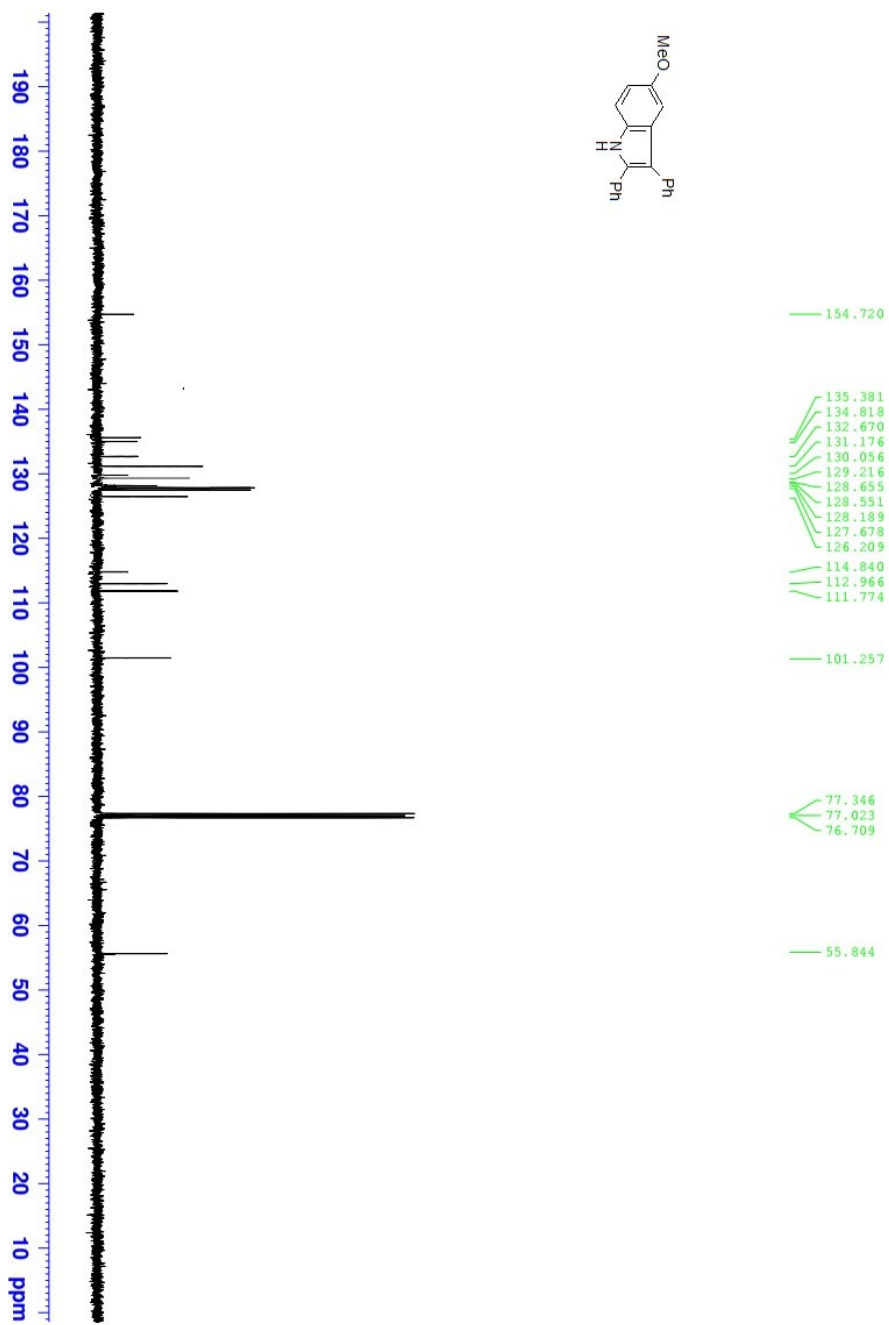

<sup>13</sup>C NMR of Compound 3ka

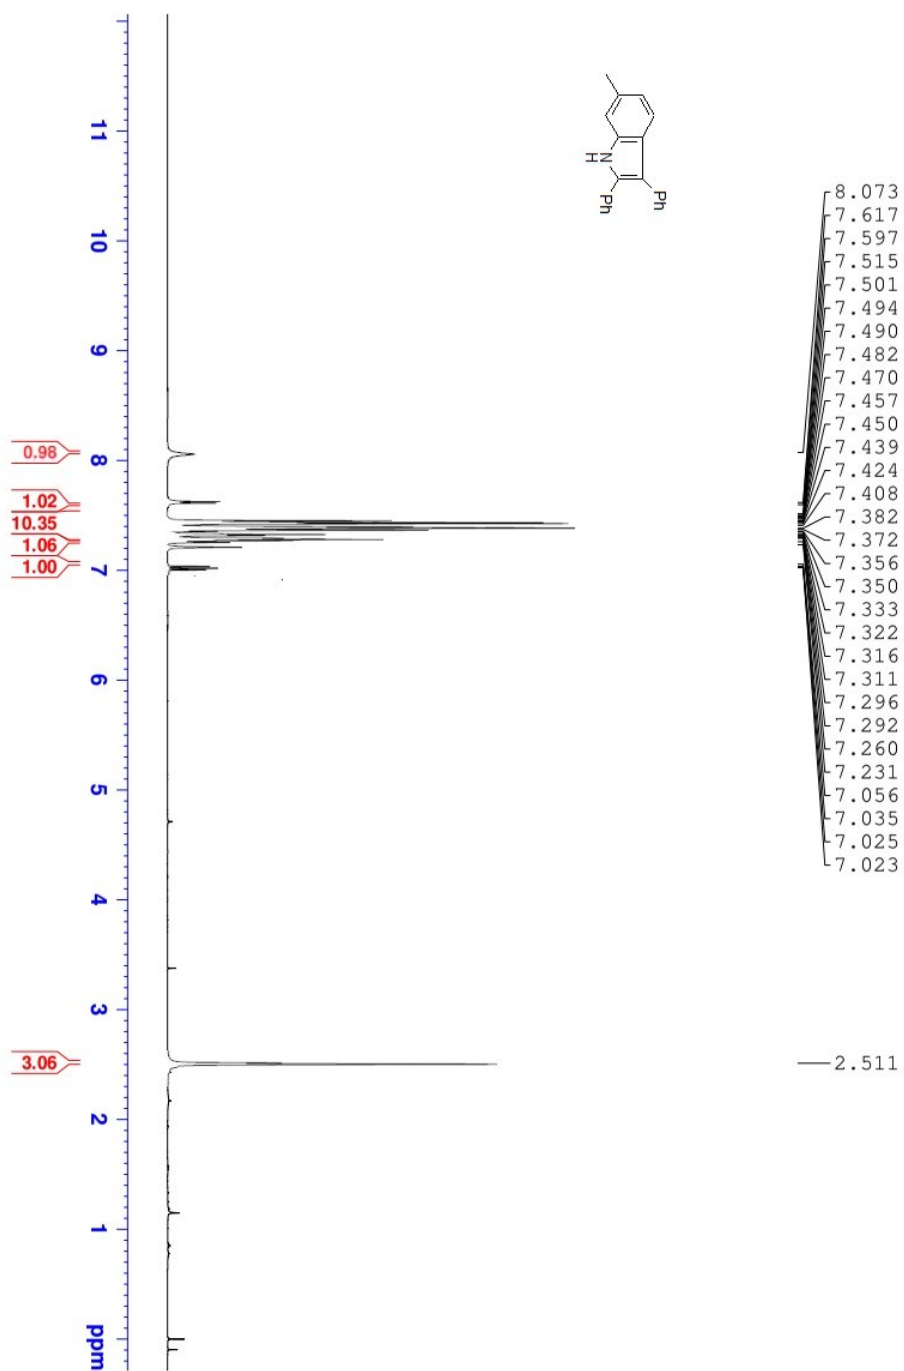

**<sup>1</sup>H NMR of Compound 3la**



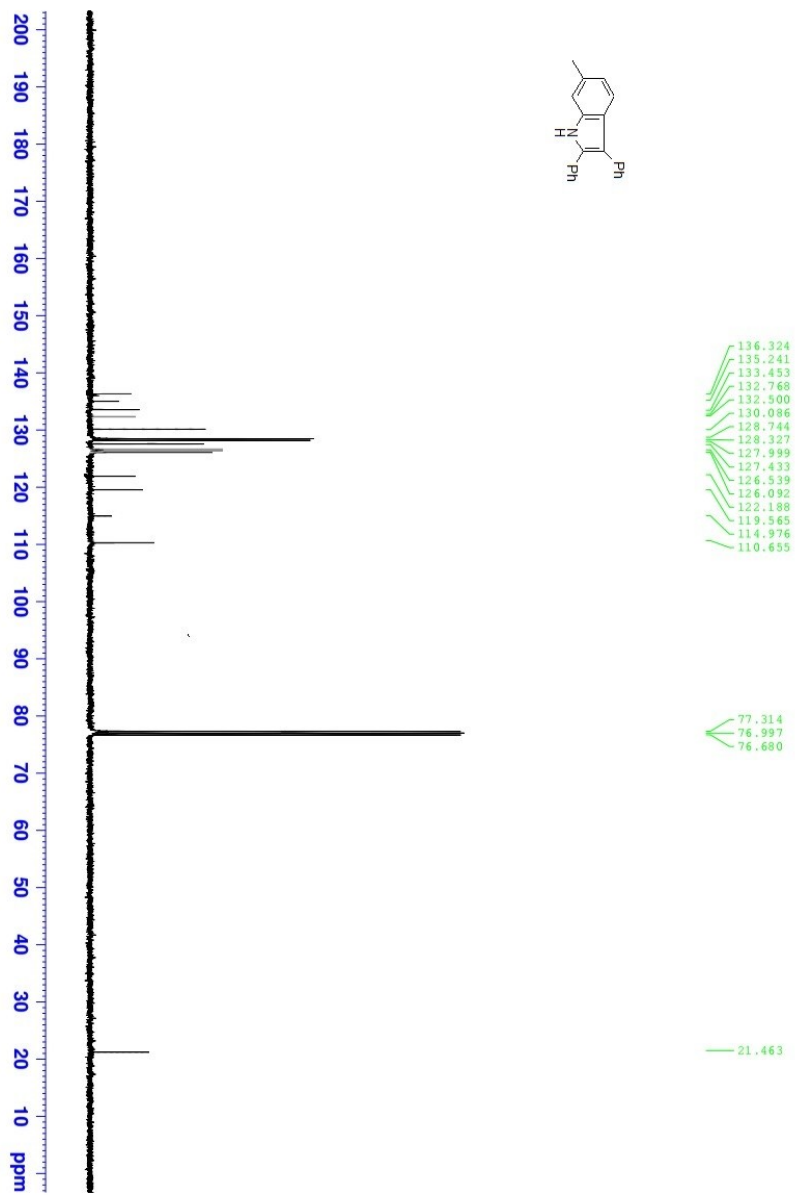

**<sup>13</sup>C NMR of Compound 3la**
